# Supplementary material for: On the scaling of wind turbine rotors
Source: Copernicus journal article supplement (doi:10.5194/wes-2020-66), 2020-03-30
Supplement: Supplementary file [file wes-2020-66-AC1-supplement.pdf]

## REVISION TO MANUSCRIPT DRAFT

### Wind Energy Science Discussion

#### On the scaling of wind turbine rotors

The authors would like to thank the two reviewers for their time and for the useful feedback. All their inputs have been taken into consideration, and have contributed to the improvement of the paper. In addition, we have taken the opportunity of this revision to make several editorial changes in order to improve readability, and we have expanded the text at various points throughout the manuscript to improve clarity.

A revised version of the paper is attached to the present reply, with the main changes highlighted in red (deletions) and blue (additions).

A list of point-by-point replies to the reviewers' comments is reported in the following.

#### Reviewer #1

##### Numbered comments

1. **[Reviewer]** *On page 1, line 24, "an alternative design approach". What exactly is the design approach?*

**[Authors]** We believe there is a typo and the reviewer means page 3, line 24. The alternative design approach refers to the complete aerostructural redesign of the blade external shape and internal structure. The sentence has been modified to improve clarity.

2. **[Reviewer]** *On page 7, line 9, "Hence, non-dimensional deflections can always be matched, provided that the stiffness is adjusted as shown". But the stiffness can not always be adjusted as it needs easily due to the limitation on the material properties. The author should consider to strengthen this argument.*

**[Authors]** We agree, and this is one of the main challenges in the design of scaled models. To solve the problem, very often scaled models are designed with a different structural configuration and choice of materials than the original full-scale system. To clarify this point, three new references have been added (Wan and Cesnik, 2014; Ricciardi et al., 2016; Busan, 1998), and section 3.2 has been significantly expanded, adding a detailed mathematical formulation of the re-design problem. The description of the redesigned models has also been expanded (correcting also some imprecisions that were present in the previous version). These modifications also address comment #1 of Reviewer #2.

3. **[Reviewer]** *On page 11, line 5 "If the model is actuated (with generator, pitch and yaw), it becomes increasingly difficult if not altogether impossible to house these systems in the reduced dimensions of the model." It is difficult to understand this sentence. What does the author mean?*

**[Authors]** The paragraph has been rewritten to improve clarity.

4. **[Reviewer]** *On page 16, line 1 "For instance, the standard blades of the V27 weigh 600 kg (Vestas, 1994); four times more than the gravo-aeroservoelastically scaled blades of the S-model." The author should consider or mention that the V27 blade was designed 15 years ago using relatively old technology, which should be heavier than a blade designed by newer technology.*

**[Authors]** Thank you for this remark. The text has been modified to address this point.

5. **[Reviewer]** On page 17, line 9 “as efficiency is still relatively high” What is your reference case for this statement?

**[Authors]** The authors mean that the FFA-W3-241 airfoil at the typical Reynolds numbers of the W- and S-models is still performing reasonably well with respect to the airfoil performance at full-scale. We agree that this sentence can be misleading, and we have reformulated it to improve clarity.

6. **[Reviewer]** On page 17, line 11 “the FFA-W3-241 airfoil behaves very poorly.” Could you please show a figure here?

**[Authors]** This sentence has been replaced by a more general explanation of the need to adopt a low-Reynolds airfoil. We believe it is no longer necessary to show a figure of the performance of the FFA-W3-241 airfoil at the Reynolds number of the T-model.

7. **[Reviewer]** On page 17, line 12 “because its aerodynamic characteristics at the scaled Reynolds are in reasonable agreement with the ones of the original airfoil at its full-scale Reynolds.” Could you show a figure to support your argument?

**[Authors]** The efficiency and polars of the RG14 airfoil at the typical Reynolds number of the T-model have been added to Figure 1.

8. **[Reviewer]** On page 19, line 3 “The third web of the full-scale blade is also extremely thin (less than 1 mm) and very close to the trailing edge.” This sentence is misleading. If I understand correctly, should it be the blade of W-model or S-model?

**[Authors]** Thank you for spotting this error. The sentence refers to the structure of the blade of the S-model. The text has been corrected.

9. **[Reviewer]** On page 19, line 7 “For example, the outer shell requires an elasticity modulus of 6.6 GPa and a density of 1,845 ” Is this statement made for which sub-scaled blade? W-model or S-model?

**[Authors]** The statement refers to the W-model. The text has been improved for clarity.

10. **[Reviewer]** On page 19, line 31 “matrices”. What matrices? Could you please be more detailed?

**[Authors]** Thank you for spotting this typo. The sentence has been corrected.

11. **[Reviewer]** On page 20, Figure 3. Too much information is provided in this figure. If you could remove some of the non-relevant info, you could improve the clarity of the figure.

**[Authors]** Thank you for this suggestion, we completely agree. We have replaced the plot by a simpler one to improve clarity.

12. **[Reviewer]** On page 20, line 13-14. Why extreme loads are not considered?

**[Authors]** Maximum stresses and strains are computed from extreme loads. The scaled models presented in this work were designed only considering extreme loads from DLC 1.1 (power production with normal turbulence model), but a more detailed design should be based on extreme loads resulting from a larger set of DLCs, including operating conditions in extreme events and stand still conditions. The paragraph has been expanded to address this point.

13. **[Reviewer]** On page 23, Figure 5. Could you explain more in detailed about the “reference” used in figure 5?

**[Authors]** The lines marked “reference” in Figures 4 and 5 display characteristics (e.g. stiffness and mass distributions) of the full-scale blade, sub-scaled with the corresponding scaling factors. This clarification has now been added to the caption of Figures 4 and 5.

14. **[Reviewer]** On page 24, line 7-8 "The proportional-integral-derivative gains used for the scaled models are obtained by scaling the ones of the full-scale machine," Why and how do you scale these PID gains? In my opinion, a good method is to re-tune them. Could you explain on why you scale them instead of re-tune?

**[Authors]** Both scaling and re-tuning of the controllers are possible methods to define the control strategy of the scaled models. We chose the first option because it is the conservative one, whereas an ad-hoc re-optimization of the controllers might hide some mismatched characteristic of the scaled turbines. We have expanded the text to better explain this point.

15. **[Reviewer]** On page 24, line 22 "up-scaled". From my understanding, should this be downscaled?

**[Authors]** The various computed quantities of all sub-scale models are up-scaled to the full scale. They are then directly compared to the corresponding quantities of the full-scale model.

16. **[Reviewer]** On page 24, section 5, The wake model used for calculate wake deficit is not mentioned. Could you briefly describe it?

**[Authors]** The wake is modeled by the superposition of a turbulent wind grid generated with TurbSim and the first order solution of the wind speed deficit of the Larsen model (EWTSII model). This explanation has now been added to the text.

17. **[Reviewer]** On page 26, line 3-4, "The mismatch is due to a slightly higher sectional mass in the last 20 [sic]

**[Authors]** This sentence refers to the slightly higher sectional mass of the W-model around the section positioned at 90% of blade span, which can be observed in Fig. 4. However, the sentence seems truncated and we do not understand the reviewer's question.

18. **[Reviewer]** On page 26. What about the comparison of the natural frequencies? Could you please show one plot regarding the frequencies in this section?

**[Authors]** The first three nondimensional natural frequencies of the W- and S-models are placed with a tolerance of 5% respect the full-scale ones. For the T-model, the placement of the edgewise frequency is well above the reference value due to the very large chord. The placement of the natural frequencies for all models is given in the text.

A figure displaying the comparison of natural frequencies for the three models is shown here:

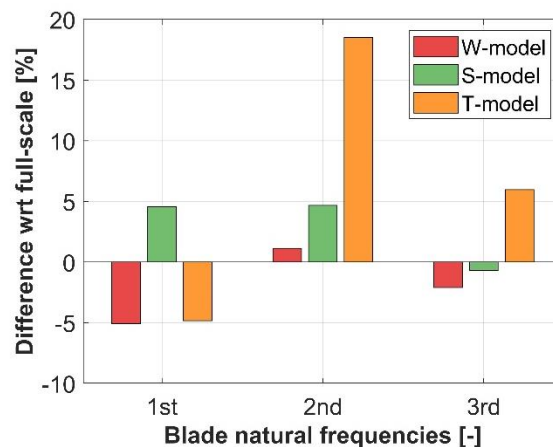

However, we have not included this figure in the manuscript, since the same information can be found in the text, and the paper is already quite long and with many figures.

19. **[Reviewer]** On page 27, line 7-8, Which wake model is used?

[Authors] See comment #16.

20. [Reviewer] On page 27, line 13, The critical explanation of the results shown in figure 8 is missing.

[Authors] Thank you for pointing this out. We have now added a critical explanation of the results shown in Figure 8.

21. [Reviewer] In general, The results and conclusions reflect the outcome of this research work well. But some statement is missing, for example, it was not mentioned how the rated wind speed, rotor speed were selected during the sub-scaling design process?

[Authors] The rated wind speed and rated rotor speed are defined with the scaling laws. Indeed, the sub-scale models are designed to have the same TSR as the full-scale machine. The rated rotor speed can then be automatically derived as:

$$\Omega_M = \frac{\Omega_P}{n_t}$$

If the  $C_p$  of the sub-scale model is equal to the full-scale model one, the rated speed would scale as follows:

$$V_{rated_M} = V_{rated_P} \frac{n}{n_t}$$

The rated wind speed is adapted for each model to account for differences in  $C_p$ -TSR curves. We have included this information to section 4.2.

#### Technical corrections

1. [Reviewer] On page 3, line 34, “aeroelastically” -> aero-elastically

[Authors] We believe “aeroelastically” is consistent with the spelling guidelines used in the article.

2. [Reviewer] On page 19, line 14, on -> in

[Authors] Thank you, the typo has been corrected.

3. [Reviewer] On page 19, line 29, composites -> composite; appear -> appears

[Authors] The sentence refers to both biaxial and uniaxial glass-fiber-reinforced plastic composites, therefore we believe it is correct to use the plural form.

4. [Reviewer] On page 27, line 18, overestimation -> over estimation

[Authors] We believe “overestimation” is consistent with the spelling guidelines used in the article.

#### Reviewer #2

##### Specific comments

1. [Reviewer] Page 10, line 2: While stiffness can be changed to some extent through material substitutions and laminate sizing, and non-structural mass can be added, the effects are seen in both flap and edge directions, so some trade-off will likely need to be made depending on the scaled phenomena and modes in question. The author could elaborate on this issue as it would likely be critical to scaling aero-elastic instabilities, for instance.

[Authors] We agree that the stiffness adjustment might not always be straightforward and it might be necessary to make some compromises to overcome the challenges it presents (such as

the choice of suitable materials). We have expanded the text to better explain the matching design problem, as already noted in replying to comment #2 of Reviewer #1.

2. **[Reviewer]** *Page 16, Table 7: For scaled turbines, the tower height and stiffness is fixed. This influences the dynamics of the rotor system. How does the scaling of the rotor take this into account?*

**[Authors]** The tower characteristics listed in Table 7 correspond to the full-scale tower characteristics sub-scaled with the corresponding scaling factors (listed in Table 6). This paper focuses on scaling approaches for the design of the wind turbine rotor and assumes the external and internal characteristics of other components such as tower, drivetrain or actuators to be perfectly scaled according to the scaling factors. However, we agree that it might not always be possible to adopt components whose dimensions and characteristics perfectly follow the scaling laws. The adoption of functional larger components might affect the turbine behavior. If this affects quantities that should be accurately represented at scale, different scaling factors should be chosen. We modified part of section 2.3 to address this comment, as well as comment #3 of Reviewer #1.

3. **[Reviewer]** *Page 21, line 10: Fatigue is mentioned here, but without data to evaluate the claim. Also, material strength is not discussed as a limitation. This seems unlikely to be true. The operational loads of the turbine can be modified to some extent by the controller, but there are still parked loads that are quite high. This would be a very practical issue with a scaled rotor in a field environment.*

**[Authors]** This is a very good point, thank you for bringing it up. The design of the W- and S-blades is based on extreme loads resulting from DLC 1.1 and material strength was not identified as a limitation. However, the inclusion of a larger set of DLCs (including extreme events and parked conditions) will create more challenging situations that might increase the requirements. In this case, requirements on material strength should be considered during material selection. This point is now discussed in section 4.3.2.

#### Technical comments:

1. **[Reviewer]** *Page 18, line 8: Perhaps "issues", "difficulties" or "challenges" is a better word choice than "aspects"*  
*"Aspects" has been replaced by "challenges"*

The authors

# On the scaling of wind turbine rotors

Helena Canet<sup>1</sup>, Pietro Bortolotti<sup>2</sup>, and Carlo L. Bottasso<sup>1</sup>

<sup>1</sup>Wind Energy Institute, Technische Universität München, 85748 Garching b. München, Germany

<sup>2</sup>National Renewable Energy Laboratory, Golden, CO 80401, USA

**Correspondence:** Carlo L. Bottasso (carlo.bottasso@tum.de)

## Abstract.

This article formulates laws for scaling wind turbine rotors. Although the analysis is general, the article primarily focuses on subscaling, i.e. on the design of a smaller size model ~~mimicking that mimicks~~ a full-scale machine. The present study considers both the steady-state and transient response cases, including the effects of aerodynamic, elastic, inertial and gravitational forces.

5 The analysis reveals the changes to physical characteristics induced by a generic change of scale, indicates which characteristics can be matched faithfully by a ~~sub-sealed~~subscaled model, and states the conditions that must be fulfilled for desired matchings to hold.

Based on the scaling laws formulated here, two different strategies ~~to design for designing~~ scaled rotors are considered: in the first strategy the scaled model is simply geometrically zoomed from the reference full-scale one, ~~while-whereas~~ in the

10 second strategy the scaled rotor is completely redesigned in order to match desired characteristics of the full-scale machine. The redesign approach is formulated as constrained optimal aerodynamic and structural matching problems of wide applicability.

The two strategies are discussed and compared, highlighting their respective advantages and disadvantages. The comparison considers the scaling of a reference ~~10-MW-10 MW~~ wind turbine of about 180 m of diameter down to three different sizes of 54, 27 and 2.8 m. Simulation results indicate that, with the proper choices, several key performance indicators can be accurately

15 matched even by models characterized by significant scaling factors.

## 1 Introduction

This article is concerned with the aeroservoelastic scaling of wind turbine rotors. The general scaling problem includes both up- and sub- (or down-) scaling. This work primarily focuses on the latter aspect, i.e. on the design of ~~sub-sealed~~subscaled models, but briefly touches also upon the former. Specifically, this work tries to answer the following scientific questions:

- 20
- What are the effects of a change of scale (i.e. both in the case of up- and subscaling) on the steady and transient response of a wind turbine?
  - What steady and transient characteristics of the response of a full-scale wind turbine can be matched by a ~~sub-sealed~~subscaled model?
  - What are the most suitable ways to design the aerodynamic and structural characteristics of a ~~sub-sealed~~subscaled
- 25 model?

The understanding of both up- and subscaling is relevant to contemporary wind energy technology.

Regarding ~~up-sealing~~upscaling, wind turbines have experienced a continuous growth in size in the past decades. This trend has been mostly driven by the reduction in the cost of energy that can be obtained by increasing the energy capture through larger rotor swept areas and taller towers. The design of the next- generation wind turbines, especially for offshore applications, is expected to follow this same path, with announced rotor diameters of future products already exceeding 200 m. It should be noted that larger blades are not simply scaled up versions of smaller blades, but are designed in order to beat the cubic law of growth and limit weight (and hence cost). Therefore, although the design of larger blades is not a simple ~~up-sealing exercise~~, ~~an understanding of upscaling exercise~~, it is clearly useful to understand the changes that can be expected in a turbine response as ~~a result of an increase in size is clearly very useful~~the result of a size increase.

Subscaling, on the other hand, is useful as a research tool: by designing and testing smaller-scale versions of full-scale references, one can validate simulation tools, explore ideas, compare alternative solutions and deepen the knowledge and understanding of complex physical phenomena. Two ~~sub-sealed~~subscaled testing activities are possible: wind tunnel testing with small-scale models, and field testing with small turbines. In both cases, the goal is to match at least some of the characteristics of the original full-scale problem. Clearly, this requires a full understanding of the effects of a change (in this case, a reduction) of scale on the response of a wind turbine.

Wind tunnel testing of ~~sub-sealed~~subscaled wind turbine models offers some unique opportunities, including the fact that the operating conditions in a wind tunnel are known, controllable and repeatable. In addition, cost, time and risks are much more limited than in the case of field testing. The first wind tunnel experiments on wind turbine aerodynamics were conducted in the last decades of the 20th century, as summarized in Vermeer et al. (2003). Studies carried out during the Unsteady Aerodynamics Experiment -(Simms et al., 2001) with a 10 m-diameter, stall-regulated ~~20-kW~~20 kW turbine were, among others, key to uncovering the importance of specific flow phenomena, such as dynamic stall, 3D rotational effects and tower-wake interactions. Later, the 4.5-m-diameter scaled models designed for the Model rotor EXperiments In controlled COnditions (MEXICO) project enabled the validation of multiple aerodynamic models, ranging from blade element momentum (BEM) to computational fluid dynamics (CFD) (Snel et al., 2009). These wind turbine models were designed following a set of scaling laws aimed at replicating as accurately as possible the aerodynamic behavior of full-scale machines. More recently, the inclusion of closed loop controls and aeroservoelastic considerations in the scaling process expanded the scope of wind tunnel testing beyond aerodynamics (Campagnolo et al., 2014). Nowadays, wind tunnel tests are extensively used to gain a better understanding of wake effects, to validate simulation tools and to help develop novel control strategies (Bottasso and Campagnolo, 2020). The recent study of Wang et al. (2020) tries to quantify the level of realism of wakes generated by small-scale models tested in a boundary layer wind tunnel.

Unfortunately, it is typically not possible to exactly match all relevant physical processes between full-scale and ~~sub-seale~~subscale models. This mismatch increases with the scale ratio and it becomes especially problematic when large wind turbines (with rotor sizes on the order of  $10^2$  meters, and power ratings on the order of  $10^6$ – $10^7$  W) are scaled to very small-size wind tunnel models (characterized by rotors on the order of  $10^{-1}$ – $10^0$  meters, and power ratings on the order of  $10^0$ – $10^2$  W). To limit the scale factor, instead of using very small models in a wind tunnel, testing can be conducted in the field with small-size wind

turbines (with a rotor on the order of  $10^1$  m, power ratings on the order of  $10^5$  W). Examples of state-of-the-art experimental test sites realized with small-size wind turbines are the Scaled Wind Farm Technology (SWiFT) facility in Lubbock, Texas (Berg et al., 2014), which uses three Vestas V27 turbines, or the soon-to-be-ready Winsent complex-terrain facility in the German Swabian Alps (ZSW, 2016), which uses two S&G ~~750-kW~~ 750 kW turbines.

65 Reducing the scaling ratios and moving to the field offers the opportunity to overcome some of the constraints typically present in wind tunnel testing (although some of the advantages of wind tunnels are clearly lost). However, research has so far mainly focused on steady-state aerodynamics and wake metrics. For example, within the National Rotor Testbed project (Resor and Maniaci, 2013), teams at the University of Virginia, Sandia National Laboratories and the National Renewable Energy Laboratory have designed a blade to be installed at the SWiFT experimental facility, replacing the original Vestas V27  
70 blade. The scaling laws were specifically chosen to replicate the wake of a commercial ~~1.5-MW~~ MW rotor at the ~~sub-seale~~ subscale size of the V27 turbine. To capture the dynamic behavior of very large wind turbines, additional effects must however be considered in the scaling laws. For example, Loth et al. (2017) have recently proposed a methodology to include gravity in the scaling process, and they have demonstrated their approach to scale a ~~100-m~~ 100 m blade down to a ~~25-m~~ 25 m size. Gravity is also crucially important in floating offshore applications (Azcona et al., 2016) to balance buoyancy and correctly  
75 represent flotation dynamics, with its effects on loads, stability and performance and with implications in control design.

This paper considers the general problem of scaling a wind turbine rotor to a different size, including the effects caused by aerodynamic, elastic, inertial and gravitational forces. The study is structured in two main parts. Initially, an analysis of the problem of scaling is presented. The main steady and transient characteristics of a rotor in terms of performance, aeroservoelasticity and wake shedding are considered, and ~~their-modifications-the effects~~ caused by a generic change of scale are  
80 determined. The analysis reveals that, in principle, most of the response features can be faithfully represented by a ~~sub-sealed~~ subscaled model. However, an exact matching of all features is typically impossible because of Reynolds effects, which lead to changes in the aerodynamic behavior of the system. Another limit comes from wind conditions: wind is not scaled when using utility-size models in the field, and wind tunnel flows can only partially match the characteristics of the atmospheric boundary layer. The analysis also shows that scaling is essentially governed by two parameters: the geometric (length) scaling factor and  
85 the time scaling factor. Based on these two parameters, all matched and unmatched quantities can be fully characterized.

In its second part, the paper continues by looking at the problem of designing a ~~sub-sealed~~ subscaled model, considering both the zooming-down method of Loth et al. (2017) and ~~an alternative design approach~~ a different approach based on a redesign procedure. Both strategies aim at replicating the dynamic behavior (including gravitational effects) of a ~~very large full-scale~~ wind turbine at a ~~much~~-smaller scale, and they are therefore based on the same scaling laws. ~~While-Whereas~~  
90 the approach of Loth et al. (2017) consists of the zooming-down of all blade characteristics ~~-,~~ based on a pure geometrical scaling, an alternative ~~method-consists-of-a~~ complete aerostructural redesign is formulated here in terms of two constrained optimizations: the aerodynamic one defines the external shape of the ~~external shape and internal structure of the~~ blade. ~~Clearly, this-,~~ while the structural optimization sizes the structural components. In both cases, the constrained optimization aims at matching desired characteristics of the full-scale system. Clearly, the complete redesign is a more complicated process than  
95 a pure geometric scaling. However, the main goal of ~~a-sealing-exercise~~ scaling is that of designing a rotor that matches



at scale the behaviour of a target full-scale machine as ~~well-closely~~ as possible. From this point of view, the simplicity of ~~design—which design—which~~ is a one-off ~~activity—is activity—is~~ less of a concern, especially today, when sophisticated automated rotor design tools are available (Bortolotti et al., 2016). ~~Furthermore, a pure geometric scaling may not be feasible with large-scale factors, as the thicknesses of some structural elements typically become too small. In that case~~ Apart from   
100 ~~simplicity, zooming is very often simply not possible for large scale factors because of unrealistically small sizes (especially the thickness of shell structures), non-achievable material characteristics, or impossible to duplicate manufacturing processes (Wan and Cesnik, 2014; Ricciardi et al., 2016). In all those cases,~~ a different ~~aerodynamic shape,~~ structural configuration and materials ~~should be are~~ used to obtain the desired ~~structural dynamic~~ behavior, as shown, for example, in the design of a small-size ~~aeroelastically-sealed~~ ~~aeroelastically-scaled~~ rotor by Bottasso et al. (2014). ~~To understand whether anything can be gained in terms of faithfulness of the scaled model by a more complete redesign procedure, this paper compares the, or as customarily done in the design of scaled flutter models for aeronautical applications (Busan, 1998). To understand their advantages and limits, these~~ two alternative methodologies ~~and applies them are applied here~~ to the scaling of a large rotor ~~down~~ to different model sizes. The results of these scaling exercises are used for illustrating what can be expected ~~in general~~ from a scaled model.

A final section ~~concludes-completes~~ the paper, listing the main conclusions that can be drawn from the results ~~,highlighting the limitsof the present study and indicating a possible path for future workand highlighting their limits.~~

110 ~~the limitsof the present study and indicating a possible path for future workand highlighting their limits.~~

## 2 Scaling

Buckingham's II Theorem (Buckingham, 1914) states that a scaled model (labelled  $(\cdot)_M$ ) has the same behavior as a full-scale physical system (labelled  $(\cdot)_P$ ) if all the  $m$  relevant nondimensional variables ~~, $\pi_i$ ,~~ are matched between the two systems. In other words, when the governing equations are written as

$$115 \quad \phi(\pi_{1P}, \dots, \pi_{mP}) = 0, \quad (1a)$$

$$\phi(\pi_{1M}, \dots, \pi_{mM}) = 0, \quad (1b)$$

then the two systems are similar if

$$\pi_{iP} = \pi_{iM}, \quad i = (1, m). \quad (2)$$

Depending on the scaled testing conditions, not all dimensional quantities can usually be matched. In the present case, we   
120 consider that testing is performed in ~~the~~ air, either in a wind tunnel or in the field, neglecting hydrodynamics.

The length (geometric) scale factor between scaled and full-scale systems is defined as

$$n_l = \frac{l_M}{l_P}, \quad (3)$$

where  $l$  is a characteristic length (for example the rotor radius  $R$ ), whereas the scale factor for time ~~, $t$ ,~~ is defined as

$$n_t = \frac{t_M}{t_P}. \quad (4)$$

125 As a consequence of these two definitions, one can estimate the angular velocity and wind speed scaling factors, which respectively write  $n_\Omega = \Omega_M/\Omega_P = 1/n_t$  and  $n_v = V_M/V_P = n_l/n_t$ . A nondimensional time can be defined as  $\tau = t\Omega_r$ , where  $\Omega_r$  is a reference rotor speed; for example, the rated one. It is readily verified that, by the previous expressions, nondimensional time is matched between the model and physical system, i.e.  $\tau_M = \tau_P$ . The two factors  $\tau n_l$  and  $n_t \tau$  condition, to a large extent, the characteristics of a scaled model.

## 130 2.1 Steady state

### 2.1.1 Rotor aerodynamics

The power coefficient characterizes the steady-state performance of a rotor, and it is defined as  $C_P = P/(1/2\rho AV^3)$ , where  $P$  is the aerodynamic power,  $\rho$  the density of air,  $A = \pi R^2$  the rotor disk area and  $V$  the ambient wind speed. The thrust coefficient characterizes the wake deficit and the rotor loading and is defined as  $C_T = T/(1/2\rho AV^2)$ , where  $T$  is the thrust  
135 force. For a given rotor, the power and thrust coefficients depend on tip-speed ratio (TSR)  $\lambda = \Omega R/V$ , and blade pitch  $\beta$ , i.e.  $C_P = C_P(\lambda, \beta)$  and  $C_T = C_T(\lambda, \beta)$ .

It is readily verified that  $\lambda_M = \lambda_P$  for any  $n_l$  and  $n_t$ , which means that it is always possible to match the scaled and full-scale TSR. This ensures the same velocity triangle at the blade sections and the same wake helix pitch.

Ideally, a scaled model should match the  $C_P$  and  $C_T$  coefficients of a given full-scale target; it is clearly desirable for the  
140 match not to hold at a single operating point, but over a range of conditions. BEM theory (Manwell et al., 2002) shows that both rotor coefficients depend on the steady-state aerodynamic characteristics of the airfoils. In turn, the lift  $C_L$  and drag  $C_D$  coefficients of the aerodynamic profiles depend on the angle of attack, and on the Mach and Reynolds numbers.

The local Mach number accounts for compressibility effects, and is defined as  $Ma = W/a_s$ , where  $W$  is the flow speed relative to a blade section, and  $a_s$  is the speed of sound. Using the previous expressions, the Mach number of the scaled model  
145 is  $Ma_M = Ma_P n_l/n_t^2$ . Because of typical tip speeds, compressibility does not play a significant role in wind turbines. Hence, the matching of the Mach number can be usually neglected ~~in current wind turbine applications~~for current wind turbines. The situation might change for future offshore applications where, without the constraints imposed by noise emissions, higher tip-speed and TSR rotors may have interesting advantages.

The Reynolds number represents the ratio of inertial to viscous forces, and is defined as  $Re = \rho l u / \mu$ , where  $l$  is a characteristic length,  $u$  a characteristic speed and  $\mu$  the dynamic viscosity. In the present context, the most relevant definition of the  
150 Reynolds number is the one referred to the blade sections, where  $l = c$  is the chord length, and  $u = W$  is the flow speed relative to the blade section. In fact, the Reynolds number has a strong effect on the characteristics and behavior of the boundary layer that develops over the blade surface, which in turn, through the airfoil polars, affects the performance and loading of the rotor. Testing in ~~the~~ air in a wind tunnel or in the field (hence with similar  $\rho$  and  $\mu$ , but with a reduced chord  $c$ ) leads to a mismatch  
155 between the scaled and full-scale chord-based Reynolds numbers, as  $Re_M = Re_P n_l^2/n_t$ .

The effects due to a chord-based Reynolds mismatch can be mitigated by replacing the airfoils of the full-scale system with others better suited for the typical Reynolds ~~numbers~~conditions of the scaled model (Bottasso et al., 2014). A second

approach is to increase the chord of the scaled model. This, however, has the effect of increasing the rotor ~~solidity—defined~~ solidity—defined as  $\Sigma = BA_b/A$ , where  $B$  is the number of blades and  $A_b$  the blade planform ~~area—which area—which~~ area—which area—which may have additional consequences. In fact, the TSR of the maximum power coefficient is directly related to rotor solidity. This can be shown by using classical BEM theory with wake swirl, which gives the optimal blade design conditions by maximizing power at a given design TSR  $\bar{\gamma}\lambda_d$ . By neglecting drag, the optimal design problem can be solved analytically to give the chord distribution of the optimal blade along the spanwise coordinate  $r$  (Manwell et al., 2002):

$$\frac{c(r)}{R} = \frac{16\pi}{9BC_L\lambda_d^2 r/R}. \quad (5)$$

Although based on a simplified model that neglects some effects, this expression shows that chord distribution and design TSR are linked. This means that, if one increases solidity (and hence chord) to contrast the Reynolds mismatch while keeping  $C_L$  fixed, the resulting rotor will have a lower TSR ~~for~~ for-corresponding to the optimum power coefficient. Therefore, this technique of correcting the Reynolds moves the optimal TSR away from the one of the full-scale reference, which may or may not be acceptable, depending on the goals of the model. For example, if one wants to match the behavior of the  $C_P - \lambda$  curves over a range of TSRs, such an approach would not be suitable. As shown by Eq. (5), this effect can be eliminated or mitigated by changing the design  $C_L$  accordingly; however, if this moves the operating condition of the airfoil away from its point of maximum efficiency, a lower maximum power coefficient will be obtained.

In addition, chord  ~~$\bar{\gamma}c$~~  and lift  ~~$\bar{\gamma}$~~  and lift  $C_L$   ~~$\bar{\gamma}$~~  are further constrained by the circulation  $\bar{\gamma}\Gamma = 1/2cC_LW$  (Burton et al., 2001), which plays an important role in the aerodynamics of the rotor and its wake.

Considering first the rotor, the lift and drag generated by the airfoils located close to the blade root are modified by the combined effects of centrifugal and Coriolis forces. In fact, the former cause a radial pumping of the flow that, as a result, moves outboard in the spanwise direction. This radial motion over a rotating body generates chordwise Coriolis forces that alleviate the adverse pressure gradient on the airfoils and, in turn, delay stall. As shown by the dimensional analysis developed by Dowler and Schmitz (2015), rotational augmentation causes multiplicative corrections, noted  $g_{C_L}$  and  $g_{C_D}$ , to the nonrotating lift and drag coefficients that can be written, respectively, as

$$g_{C_L} = \left(\frac{c}{r}\right)^2 \left(\frac{\Gamma}{RW}\right)^{1/2} \left(\frac{\Omega r}{2W}\right)^{-2}, \quad (6a)$$

$$g_{C_D} = \frac{1}{3} \left(\frac{r}{R}\right) \left(\frac{c}{r}\right)^{-1} \left(\frac{d\theta}{dr} \frac{R}{\Delta\theta}\right) \left(\frac{\Omega r}{2W}\right), \quad (6b)$$

where  $\Delta\theta$  is the total blade twist from root to tip. Equations (6) show that, in order to match the effects of rotational augmentation, the model and full-scale system should have the same blade nondimensional chord and twist distributions, the same nondimensional circulation  $\bar{\gamma}\Gamma/(RW)$ , and the same Rossby number  $\bar{\gamma}Ro = \Omega r/(2W)$ , which represents the ratio of inertia to Coriolis forces. Matching nondimensional circulation between the two systems implies either matching both the planform shape  $\bar{\gamma}c/R$   ~~$\bar{\gamma}$~~  and the lift coefficient  $\bar{\gamma}C_L$ , or the product of the two. As previously noted, some of these options may lead to a different TSR of optimal  $C_P$ . On the other hand, it is readily verified that the Rossby number is always matched for any choice of  $n_l$  and  $n_t$ .

### 190 2.1.2 Wake aerodynamics

The circulation is not only relevant for rotational augmentation but also for wake behavior. In fact, each blade sheds trailing vorticity that is proportional to the spanwise gradient  $-d\Gamma/dr$  (Schmitz, 2020). Therefore, designing a blade that matches the spanwise distribution of  $\Gamma$  (and, hence, also its spanwise gradient) ensures that the scaled rotor sheds the same trailed vorticity.

195 Additionally, a matched circulation ensures also a matched thrust, which is largely responsible for the speed deficit in the wake and for its deflection in misaligned conditions (Jiménez et al., 2010).

The Reynolds mismatch derived earlier applies also to its rotor-based definition, which is relevant to wake behavior and is obtained by using  $l = 2R$  and  $u = V$ . However, Chamorro et al. (2016) showed that the wake is largely unaffected by this parameter as long as  $Re > 10^5$ , which is typically the case unless extremely small model turbines are used.

200 The detailed characterization of the behavior of scaled wakes is considered as out of the scope for the present investigation, and the interested reader is referred to Wang et al. (2020) for a specific study on this important topic.

### 2.1.3 Gravity

The Froude number represents the ratio of aerodynamic to gravitational forces and writes  $Fr = V^2/gR$ , where  $g$  is the acceleration of gravity. The Froude number of the scaled model is readily found to be  $Fr_M = Fr_P n_l / n_t^2$ . Enforcing Froude ( $Fr_M = Fr_P$ ) ~~results in~~ the time scaling factor ~~must be being set to~~  $n_t = \sqrt{n_l}$ . This condition determines the only remaining unknown in  
205 the scaling laws, so that the scalings of all nondimensional parameters can now be expressed in terms of the sole geometric scaling factor  $n_l$ . Froude scaling is used when gravity plays an important role; ~~for example,~~ for example in the loading of very large rotors or for floating offshore applications where weight and buoyancy forces should be in equilibrium.

### 2.1.4 Elasticity

The steady deflections due to aerodynamic loading of the scaled and full-scale wind turbines can be matched by adjusting  
210 the stiffness of the scaled model. In fact, consider the ~~representative case of a very simplified model of a blade represented by a~~ clamped beam of length  $R$  ~~under a uniform distributed aerodynamic load per unit span,~~ noted  $q = 1/2 \rho W^2 c C_L$  ~~as a very simplified model of a blade~~. The beam nondimensional tip deflection is  $s/R = qR^3/(8EJ)$ , where  $EJ$  is the bending stiffness,  $E$  is Young's modulus and  $J$  is the cross-sectional moment of inertia. By the previous definitions of length and time scales, one gets that  $(s/R)_M = (s/R)_P$  if  $(EJ)_M = (EJ)_P n_l^6 / n_t^2$ . Hence, nondimensional deflections can always  
215 be matched, provided that the stiffness ~~is can be~~ adjusted as shown. Matching this requirement may imply changing the material and/or the configuration of the structure, because of technological, manufacturing and material property constraints (Busan, 1998; Ricciardi et al., 2016), as discussed more in detail later on.

## 2.2 Transient response

220 A scaled model should obey some additional conditions in order for the transient response of the full-scale system to be matched.

### 2.2.1 Rotor aerodynamics and inflow

As mentioned earlier, any aerodynamically scaled model can always be designed to enforce the TSR without additional conditions. To extend the similitude to dynamics, the nondimensional time derivative of the TSR should also be matched, i.e.  $\lambda'_M = \lambda'_P$ , where a nondimensional time derivative is noted ~~as~~  $(\cdot)' = d \cdot / d\tau$ . By using the definition of  $\lambda$  one gets

$$\lambda' = \frac{\Omega' R}{V} - \lambda \frac{V'}{V}. \quad (7)$$

The rotor dynamic torque balance equilibrium writes  $I\dot{\Omega} = Q$ . In this expression,  $I$  is the rotor polar moment of inertia,  $(\dot{\cdot}) = d \cdot / dt$  indicates a derivative with respect to time, and  $Q = Q_a - (Q_e + Q_m)$  is the shaft torque. The aerodynamic torque is noted as  $Q_a = 1/2\rho ARC_P/\lambda$ , ~~whereas~~ while  $Q_e$  is the electrical torque provided by the generator and  $Q_m$  the mechanical losses. The aerodynamic torque scales as  $Q_{a_M} = Q_{a_P} n_l^5/n_t^2$ , and clearly  $Q_e + Q_m$  must scale accordingly. Since the mechanical

230 losses depend on friction, it might be difficult to always match  $Q_m$ , especially in a small-scale model. This problem, however, can be ~~corrected~~ eliminated by simply providing the necessary electrical torque to generate the correct term,  $Q_e + Q_m$ . By considering that the dimensions of  $I$  are  $[I] = [\rho_m][l]^5$ , where  $\rho_m$  is the material density and  $l$  a characteristic length, the first term  $\Omega' R/V$  in Eq. (7) is matched between the two models if the material density is matched, i.e. if  $\rho_{m_M} = \rho_{m_P}$ .

The second term ~~as~~  $\lambda V'/V$  ~~in~~ Eq. (7) is matched if the two systems operate at the same TSR and if the wind speed has the

235 same spectrum of the wind in the field. The matching of wind fluctuations (clearly, only in a statistical sense) induces the same variations in the TSR, and hence in the rotor response, but also the same recovery of the wake, which is primarily dictated by the ambient turbulence intensity (Vermeer et al., 2003).

Matching of the wind spectrum is in principle possible in a boundary layer wind tunnel, if a flow of the desired characteristics can be generated. Turbulent flows can be obtained by active (Hideharu, 1991; Mydlarski, 2017) or passive means

240 (Armitt and Counihan, 1968; ?). Active solutions are more complex and expensive, but also more flexible and capable of generating a wider range of conditions. When testing in the field, the flow is invariably not scaled. This will have various effects on the scaled model response, which might be beneficial or not depending on the goals of scaled testing. In fact, the acceleration of time ( $t_M = t_P n_t$ ) implies a shift in the wind frequency spectrum. Among other effects, this means that low probability (extreme) events happen more frequently than at full scale. Similarly, the scaling of speed ( $V_M = V_P n_l/n_t$ ) implies higher

245 amplitudes of turbulent fluctuations and gusts than at full scale.

Magnitude and phase of the aerodynamic response of an airfoil (as for example modelled by Theodorsen's theory (Bisplinghoff and Ashley, 2002)) are governed by the reduced frequency ~~as~~  $\kappa = \omega_m c / (2W)$ , where  $\omega_m$  is the circular frequency of motion. Harmonic changes in angle of attack take place at various frequencies ~~as~~  $\omega_{m_j}$ , and are caused by the inhomogeneities of the flow (shears, misalignment between rotor axis and wind vector), blade pitching and structural vibrations in bending

250 and twisting. The reduced frequency can be written as  $\kappa_j = \tilde{\omega}_{m_j} \Omega c / (2W)$ , where  $\tilde{\omega}_{m_j} = \omega_{m_j} / \Omega$  indicates a nondimensional frequency. This expressions shows that once the nondimensional frequencies,  $\tilde{\omega}_{m_j}$  —due to inflow, pitch and ~~vibrations~~ are ~~are~~ vibrations— are matched, also the corresponding reduced frequencies are matched, as the term  $\Omega c / (2W)$  is always automatically preserved between scaled and full-scale systems for any  $n_l$  and  $n_t$ .

Dynamic stall effects depend on reduced frequency  $\kappa$ , and Reynolds number. Typical dynamic stall models depend on the lift, drag and moment static characteristics of an airfoil and various time constants that describe its unsteady inviscid and viscous response (Hansen et al., 2004). As previously argued,  $\kappa$  can be matched, ~~while~~ and all time constants are also automatically matched by the matching of nondimensional time. However, a ~~Reynolds mismatch~~ mismatch of the chord-based Reynolds is typically unavoidable and will imply differences in the dynamic stall behavior of the scaled and full-scale models, which will have to be quantified on a case-by-case basis.

## 2.2.2 Wake aerodynamics

The Strouhal number is associated with vortex shedding, which has relevance in tower and rotor wake behavior; the Strouhal number has also been recently used to describe the enhanced wake recovery obtained by dynamic induction control (Fredrik et al., 2019). A rotor-wake relevant definition of this nondimensional parameter is  $St = f2R/V$ , where  $f$  is a characteristic frequency. Using the previous relationships, it is readily shown that  $St_M = St_P n_l / (n_t n_v) = 1$ , i.e. the Strouhal number is always exactly matched between scaled and full-scale models for any  $n_l$  and  $n_t$  when TSR is matched.

During transients, spanwise vorticity is shed that is proportional to its temporal gradient. Using BEM theory (Manwell et al., 2002, p. 175), the nondimensional spanwise circulation distribution is computed as

$$\frac{\Gamma}{RW} = \frac{1}{2} \frac{c}{R} C_{L,\alpha} \left( \frac{U_P}{U_T} - \theta \right), \quad (8)$$

where  $C_{L,\alpha}$  is the slope of the lift curve,  $\theta$  the sectional pitch angle, and  $U_P$  and  $U_T$  the flow velocity components at the blade section ~~, respectively, which are~~ respectively perpendicular and tangent to the rotor disk plane, such that  $W^2 = U_P^2 + U_T^2$ . The flow speed component tangential to the rotor disk is  $U_T = \Omega r + u_T$ , where  $u_T$  contains terms due to wake swirl and yaw misalignment. The flow speed component perpendicular to the rotor disk is  $U_P = (1 - a)V + \dot{d} + u_P$ , where  $a$  is the axial induction factor,  $\dot{d}$  the out-of-plane blade section flapping speed, and  $u_P$  the contribution due to yaw misalignment and vertical shear. Neglecting  $u_P$  and  $u_T$  and using Eq. (8), the nondimensional time rate of change of the circulation becomes

$$\frac{d}{d\tau} \left( \frac{\Gamma}{RW} \right) = \frac{1}{2} \frac{c}{R} C_{L,\alpha} \frac{d}{d\tau} \left( \frac{1 - a + \dot{d}/V}{\lambda} \left( \frac{R}{r} \right) - \theta \right). \quad (9)$$

For a correct similitude between scaled and full-scale systems, the nondimensional derivatives  $\lambda'$ ,  $a'$ ,  $\theta'$  and  $(\dot{d}/V)'$  should be matched.

The matching of  $\lambda'$  has already been addressed. The term  $a'$  accounts for dynamic changes in the induction, which are due to the speed of actuation (of torque and blade pitch) and by the intrinsic dynamics of the wake. The speed of actuation is matched if the actuators of the scaled model are capable of realizing the same rates of change of the full-scale system, i.e. if  $\theta'$  is matched. The intrinsic dynamics of the wake are typically modelled by a first-order differential equation (Pitt and Peters, 1981):

$$\dot{a} + Aa = b, \quad (10)$$

where  $\mathbf{a}$  represents inflow states and  $\mathbf{A}$  a matrix of coefficients proportional to  $V/R$ . It is readily verified that the ~~enforcement of the condition that nondimensional time is the same for the scaled and full-scale systems, thereby resulting matching of~~ nondimensional time results in the matching of  $a'$ . Finally, the term  $(\dot{d}/V)'$  is due to the elastic deformation of the blade, which is addressed next.

### 2.2.3 Elasticity

Considering blade flapping, the Lock number  $Lo$  is defined as

$$Lo = \frac{C_{L,\alpha} \rho c R^4}{I_b}, \quad (11)$$

where  $I_b$  the blade flapping inertia. Matching the Lock number ensures the same ratio of aerodynamic to inertial forces. Considering that the flapping inertia is dimensionally proportional to  $[\rho_m][l]^5$ , where  $\rho_m$  is the material density and  $l$  a characteristic length, matching the Lock number can be obtained by simply matching the material density of the blade, i.e.  $\rho_{mM} = \rho_{mP}$ . A similar definition of the Lock number can be developed for the fore-aft motion of the rotor due to the flexibility of the tower, leading to the same conclusion.

The system  $i$ th nondimensional natural frequency is defined as  $\tilde{\omega}_i = \omega_i/\Omega$ , where  $\omega_i$  is the  $i$ th dimensional natural frequency. Matching the lowest  $N$  nondimensional frequencies means that the corresponding eigenfrequencies in the scaled and full-scale system have the same relative placement among themselves and with respect to the harmonic excitations at the multiple of the rotor harmonics. In other words, the two systems have the same Campbell diagram (Eggleston and Stoddard, 1987). In addition, by matching nondimensional frequencies, the ratio of elastic to inertial forces is correctly scaled. Considering that the bending natural frequency of a blade is dimensionally proportional to  $\sqrt{EJ/\rho_m l^6}$ , the matching of nondimensional natural frequencies implies  $(EJ)_M = (EJ)_P n_l^6/n_t^2$ , which is the same result obtained in the steady case for the matching of static deflections under aerodynamic loading. The same conclusions are obtained when considering deformation modes other than bending, so that in general one can write  $K_M = K_P n_l^6/n_t^2$  where  $K$  is a stiffness. Here again, it can be concluded that for each given  $n_l$  and  $n_t$ , one can ~~always~~ match the frequencies by adjusting the stiffness of the scaled model.

~~It is should be remarked that this condition only defines the stiffnesses that should be realized in the scaled model, not how these are actually obtained. As noted earlier, it is typically difficult if not impossible to simply zoom down a complex realistic structure, and the model design may require a different configuration and choice of materials (Busan, 1998). An optimization-based approach to the structural matching problem is described later in this work.~~

It is worth noting that matching both the Lock number and the placement of nondimensional natural frequencies implies that structural deflections caused by aerodynamic loads are correctly scaled. In fact, the Lock number is the ratio of aerodynamic to inertial forces, while  $\tilde{\omega}_i^2$  is proportional to the ratio of elastic to inertial forces. Therefore, if both ratios are preserved, then  $Lo/\tilde{\omega}_i^2$ , being the ratio of aerodynamic to elastic forces, is also preserved. In symbols, this ratio writes

$$\frac{Lo}{\tilde{\omega}_i^2} = \frac{qL^3}{EJ}, \quad (12)$$

315 where the right-hand side is indeed proportional to the nondimensional tip deflection  $\tilde{s} = s/R$  of a clamped beam subjected to a distributed load  $\tilde{q} = C_{L,\alpha}\rho c(R\Omega)^2$ .

The matching of frequencies is also relevant to the matching of transient vorticity shedding in the wake, as mentioned earlier. In fact, assume that the blade flapping motion can be expressed as the single mode,  $d = d_0 e^{\omega_f t}$ , where  $d$  is the flapping displacement and  $\omega_f$  the flapping eigenfrequency. Then, the term  $(\dot{d}/V)'$  of Eq. (9) becomes

$$320 \quad \frac{d}{d\tau} \left( \frac{\dot{d}}{V} \right) = \frac{d_0}{R} \lambda \tilde{\omega}_f^2 e^{\tilde{\omega}_f \tau}, \quad (13)$$

where  $\tilde{\omega}_f = \omega_f/\Omega$  is the nondimensional flapping frequency. This term is matched between the scaled and full-scale models if the nondimensional flapping frequency is matched.

### 2.3 Subscaling criteria

As shown earlier, scaling is essentially governed by two parameters: the geometric scaling factor  $\tilde{n}_l$ , and the time scaling factor  $\tilde{n}_t$ . No matter what choice is made for these parameters, the exact matching of some nondimensional parameters can always be guaranteed; these include nondimensional time, TSR, and Strouhal and Rossby numbers. In addition, the matching of other nondimensional quantities can be obtained by properly scaling some model parameters, again independently from the choice of  $n_l$  and  $n_t$ . For example, selecting the material density as  $\rho_{mM} = \rho_{mP}$  enforces the matching of the Lock number, while scaling the stiffness as  $K_M = K_P n_l^6 / n_t^2$  ensures the proper scaling of the system nondimensional natural frequencies.

330 This way, several steady and unsteady characteristics of the full-scale system can ~~also be ensured for~~ be replicated by the scaled system. Other quantities, however, cannot be simultaneously matched, and one has to make a choice.

Table 1 summarizes the main scaling relationships described earlier. The reader is referred to the text for a more comprehensive overview of all relevant scalings.

The choice of the scaling parameters,  $n_l$  and  $n_t$ , is highly problem-dependent. For example, when the effects of gravity have to be correctly represented by the scaled model, then the matching of the Froude number must be enforced. By setting  $\text{Fr}_M = \text{Fr}_P$ , one obtains the condition on the time scaling factor  $\tilde{n}_t = \sqrt{n_l}$ . Having set  $n_t$ , the scalings of all nondimensional parameters can now be expressed in terms of the sole geometric scaling factor  $\tilde{n}_l$ .

Another example is given by the design of small-scale wind turbine models for wind tunnel testing, which typically leads to small geometric scaling factors  $\tilde{n}_l$ . Bottasso et al. (2014) defined an optimal scaling by minimizing the error in the Reynolds number and the acceleration of scaled time. The latter criterion was selected to relax the requirements on closed-loop control sampling time: since  $\text{Re}_M \equiv \text{Re}_P n_l^2 / n_t$ , small geometric scaling factors might require very fast scaled times and hence high sampling rates, which could be difficult to achieve in practice for closed-loop control models. Bottasso and Campagnolo (2020) used a different criterion, where a best compromise between the Reynolds mismatch and power density is sought. In fact, power density (defined as power  $P$  over volume or, in symbols,  $\rho_P = P/R^3$ ) scales as  $\rho_{PM}/\rho_{PP} = n_l^2/n_t^3$  and, hence,

345 increases rapidly for small  $n_t$ . ~~If the model is actuated (with generator, pitch and yaw),~~ For small  $n_l$  it becomes increasingly difficult, ~~if not altogether impossible to house these systems in the reduced dimensions of the model.~~



**Table 1.** Main scaling relationships relevant to a wind turbine. Additional scaling effects are discussed in the text.

| Quantity                                      | Scaling ratio                                 | Coefficient | Comment                                                                                                     |
|-----------------------------------------------|-----------------------------------------------|-------------|-------------------------------------------------------------------------------------------------------------|
| Length                                        | $l_M/l_P$                                     | $n_l$       |                                                                                                             |
| Time                                          | $t_M/t_P$                                     | $n_t$       |                                                                                                             |
| <del>Nondim.</del> <u>Nondimensional</u> time | $\tau_M/\tau_P$                               | 1           |                                                                                                             |
| TSR $\lambda$                                 | $\lambda_M/\lambda_P$                         | 1           |                                                                                                             |
| Rotor speed                                   | $\Omega_M/\Omega_P$                           | $1/n_t$     | Due to <del>nondim.</del> <u>nondimensional</u> time matching                                               |
| Wind speed                                    | $V_M/V_P$                                     | $n_l/n_t$   | Due to <del>nondim.</del> <u>nondimensional</u> time & TSR matching                                         |
| Mach number                                   | $\text{Ma}_M/\text{Ma}_P$                     | $n_l/n_t^2$ |                                                                                                             |
| Reynolds number                               | $\text{Re}_M/\text{Re}_P$                     | $n_l^2/n_t$ |                                                                                                             |
| Froude number                                 | $\text{Fr}_M/\text{Fr}_P$                     | $n_l/n_t^2$ |                                                                                                             |
| Strouhal number                               | $\text{St}_M/\text{St}_P$                     | 1           | Due to TSR matching                                                                                         |
| Rossby number                                 | $\text{Ro}_M/\text{Ro}_P$                     | 1           | Due to TSR matching                                                                                         |
| Lock number                                   | $\text{Lo}_M/\text{Lo}_P$                     | 1           | Requires $\rho_{mM} = \rho_{mP}$                                                                            |
| Nondimensional nat. freq.                     | $\tilde{\omega}_{iM}^n/\tilde{\omega}_{iP}^n$ | 1           | Requires $K_M = K_P n_l^6/n_t^2$                                                                            |
| Deflections due to aero. loads                | $\tilde{s}_M/\tilde{s}_P$                     | 1           | Due to Lock & nondim. freq. matching                                                                        |
| Reduced frequency                             | $\kappa_{jM}/\kappa_{jP}$                     | 1           | Requires $(\tilde{\omega}_{mj})_M/(\tilde{\omega}_{mj})_P$ due to inflow, pitch and vibrations              |
| Nondim. TSR rate of change                    | $\lambda'_M/\lambda'_P$                       | 1           | Requires $(Q_e + Q_m)_M = (Q_e + Q_m)_P n_l^5/n_t^2$ ,<br>$\rho_{mM} = \rho_{mP}$ and $(V'/V)_M = (V'/V)_P$ |

Other choices for the scaling criteria are clearly possible, to equip the scaled models with functional components (i.e. drive-train, generator, actuation systems, sensors, etc.) that fit in the dimensions prescribed by the scaling factors. The adoption of larger components can be acceptable or not, depending on the problem at hand. However, care must be exercised to avoid harming the validity of the results obtained with a scaled model. nonphysical effects that are generated by their bigger dimensions and the goals of the model.

An example of how delicate these choices can be is found in the experiments described by Kress et al. (2015). The experiments were conducted with a scaled water tank model. In this work, a scaled rotor was designed for experiments in a water tank, with the goal of comparing upwind and downwind turbine configurations. The rotor of the model was scaled geometrically from a full-scale reference; however, the same scaling ratio could not be used for the nacelle, because of the need to house the necessary mechanical components. As a result, in the downwind configuration the model was equipped with an unrealistically large nacelle and that, combined with the lower Reynolds number (which causes a thicker boundary layer), likely increased the redirection of the flow toward towards the outer blade portions in the downwind configuration. In turn, this led to the conclusion that nacelle blockage improves power production in downwind rotors. Although this may be true for the scaled experiment, there is little evidence that the same conclusion holds for a full-scale machine (Anderson et al., 2020) (Anderson et al., 2020). Because of miniaturization constraints, a larger nacelle is also used in the TUM G1 scaled turbine

(Bottasso and Campagnolo, 2020), a machine designed to support wake studies and wind farm control research. The effects of the out-of-scale nacelle on the wake have however been verified, and appear in this case to be very modest (Wang et al., 2020)

~

### 365 3 Design strategies

Upscaling is a design effort driven by different criteria including, among others, annual energy production (AEP), cost of material and manufacturing, logistics and transportation, etc. The situation is different for subscaling. In fact, the previous section has clarified the scaling relationships that exist between a full-scale system and its scaled model. The analysis has revealed that in general several steady and unsteady characteristics of the original system can be preserved in the scaled one.

370 The question is now how to design such a scaled model in order to satisfy the desired matching conditions. This problem is discussed in this section.

#### 3.1 Straightforward zooming-down

This approach is based on the exact geometric zooming of the blade, including both its external and internal shape, and it has been advocated by Loth et al. (2017).

375 Regarding the external blade shape, geometric zooming implies that the same airfoils are used for both the scaled and the full-scale models. The mismatch of the Reynolds number (which is  $Re_M = Re_P n_l^{3/2}$  for Froude scaling) may imply a different behavior of the polars, especially for large values of  $n_l$ . On the other hand, as shown earlier, a geometric scaling ensures the near matching (up to the effects due to changes in the polars) of various characteristics, such as optimum TSR, nondimensional circulation, rotational augmentation and vorticity shedding.

380 Regarding the internal blade shape, ~~and when using straightforward zooming,~~ the skin, shear webs and spar caps are also geometrically scaled down when using straightforward zooming. It should be noted that, for large geometric scaling factors  $n_l$ , ~~the thickness of elements such as the skin or the shear webs may become very thin, possibly less than typical composite plies.~~

The zoomed scaling has to satisfy two constraints on the properties of the materials used for its realization.

385 A first constraint is represented by the matching of material density ( $\rho_{mM} = \rho_{mP}$ ), which is necessary to ensure the same Lock number. It should be remarked that the overall material density of the blade includes not only the density of the main structural elements, but also contributions from coatings, adhesive and lightning protection. These components of the blade may not be simply scaled down, so this problem may deserve some attention.

A second constraint is represented by the scaling of the stiffness, which is necessary for ensuring the matching of nondimensional natural frequencies. For Froude scaling, stiffness changes as  $K_M = K_P n_l^5$ . Considering bending, the stiffness is  $K = EJ$ . For a blade made of layered composite materials, the bending stiffness is more complicated than the simple expression  $EJ$ , and it will typically need to be computed with an ad hoc methodology; ~~for example, the one,~~ for example using the anisotropic beam theory of Giavotto et al. (1983). However, the ~~present-expression-simple expression~~  $EJ$  is sufficient for the

dimensional analysis required to understand the effects of scaling. Since the sectional moment of inertia  $J$  is dimensionally proportional to  $l^4$ ,  $l$  being a characteristic length of the blade cross section, this constraint requires Young's modulus to change according to  $E_M = E_P n_l$ . This implies that all materials used for the scaled blade, including the core, should have a lower stiffness (and the same density) of the materials used at full scale; as shown later, this constraint is not easily met.

~~As strain~~ Since strain  $\epsilon$  is defined as the ratio of a displacement and a reference length, then ~~it follows that~~  $\epsilon_M = \epsilon_P$ . ~~It follows that.~~ Therefore, given that  $E_M = E_P n_l$ , then  $\sigma_M = \sigma_P n_l$ , and the stresses in the scaled model are reduced compared to the ones in the full-scale model. Still, one would have to verify that the admissible stresses and strains of the material chosen for the scaled blade are sufficient to ensure integrity.

The critical buckling stress of a curved rectangular plate is

$$\sigma_{cr} = k_c \frac{\pi^2 E}{12(1 - \nu^2)} \left( \frac{t}{b} \right)^2, \quad (14)$$

where  $k_c$  is a coefficient that depends on the aspect ratio of the panel, its curvature and its boundary conditions,  $\nu$  is Poisson's ratio,  $t$  the panel thickness and  $b$  the length of the loaded edges of the plate (Jones, 2006). Here again, the expression of the critical stress of a layered anisotropic composite plate would be more complex than the one reported in Eq. (14), but this is enough for the present dimensional analysis. By using the scaling relationships for length and for  $E$ , Eq. (14) readily leads to  $\sigma_{crM} = \sigma_{crP} n_l$ . This means that if the full-scale blade is buckling free, so is the scaled one, as both the critical buckling stress and the stresses themselves scale in the same manner.

### 3.2 Aerostructural redesign

An alternative approach to the design of a ~~sub-scale~~ subscale model is to identify an external shape and an internal structure that match, as closely as possible, the aeroelastic behavior of the full-scale blade. This approach offers more degrees of freedom, at the cost of an increased design complexity; indeed, one designs a new blade that, although completely different from the full-scale one, matches some of its characteristics.

In this second approach, the first step consists of defining a blade shape that can mimic the aerodynamic behavior of the full-scale system. As previously discussed, this can be obtained according to different criteria. Here, the following three conditions are considered. First, a new set of airfoils is selected to match as closely as possible, despite the different Reynolds of operation, the polar coefficients of the airfoils of the full-scale blade; this is relevant for the matching of the performance and loading of the rotor. Second, the two rotors should have ~~the same TSR to operate with the optimal power coefficient, and hence similar power coefficient~~ similarly shaped power coefficient curves, which is relevant for performance on and off the design point. Finally, the blades should have the same spanwise circulation distribution, which is relevant for ~~similar~~ a similar aerodynamic loading of the blade and wake behavior. The resulting scaled blade shape (both in terms of cross sections, because of the changed airfoils, and in terms of chord and twist distributions) will be ~~quite~~ different from the full-scale rotor. However, this is clearly irrelevant, as ~~what is of importance is the matching of the goal is to match~~ some quantities of interest between the two rotors, not their shape.

The aerodynamic design problem can be formally expressed as

$$\min_{\mathbf{p}_a} J_a(\mathbf{p}_a), \quad (15a)$$

$$\text{subject to: } \mathbf{m}_a(\mathbf{p}_a) = 0, \quad (15b)$$

$$\mathbf{c}_a(\mathbf{p}_a) \leq 0. \quad (15c)$$

430 Vector  $\mathbf{p}_a$  indicates the aerodynamic design variables, which include the chord and twist distributions  $c(\eta)$  and  $\theta(\eta)$ , appropriately discretized in the spanwise direction. The aerodynamic optimization cost is formulated as

$$J_a = \sum_i^{N_{CP}} \left( \frac{C_P(\lambda_i) - \widehat{C}_P(\lambda_i)}{\widehat{C}_P(\lambda_i)} \right)^2. \quad (16)$$

This cost drives the design towards the power coefficient of the target full-scale model  $\widehat{C}_P$ . Vector  $\mathbf{m}_a$  indicates the matching equality constraints. One set of constraints enforces the matching of the spanwise distribution of the circulation  $\widehat{\Gamma}$ :

$$435 \frac{\Gamma(\eta_i) - \widehat{\Gamma}(\eta_i)}{\widehat{\Gamma}(\eta_i)} = 0, \quad i = (1, N_\Gamma), \quad (17)$$

where  $\widehat{(\cdot)}$  indicates in general a to-be-matched scaled quantity of the target full-scale model. Another constraint may be added to prescribe the maximum power coefficient to take place at the same design TSR, i.e.  $\lambda_{\max}(C_P) = \lambda_{\max}(\widehat{C}_P)$ . Finally, vector  $\mathbf{c}_a$  specifies additional design inequality constraints, which may include a margin to stall, maximum chord and others, depending on the application.

440 Once the new aerodynamic shape is identified, the second step consists of designing in the design of an internal blade structure that can mimic the full-scale aeroelastic behavior while ensuring integrity and satisfying manufacturing and realizability constraints; for example, in the form of minimum thicknesses of the structural elements. This approach allows for more freedom than the zooming-down approach; for example, one can use different materials than the ones used for the full-scale design, and nonstructural masses can be added without affecting the matching characteristics of the scaled blade.

445 The structural design problem can be formally expressed as

$$\min_{\mathbf{p}_s} J_s(\mathbf{p}_s), \quad (18a)$$

$$\text{subject to: } \mathbf{m}_s(\mathbf{p}_s) = 0, \quad (18b)$$

$$\mathbf{c}_s(\mathbf{p}_s) \leq 0. \quad (18c)$$

450 Vector  $\mathbf{p}_s$  indicates the structural design variables, which include the size of the various blade structural elements (skin, spar caps, shear webs, leading and trailing edge reinforcements), discretized span- and chordwise. Assuming the blade to be

modelled as a beam, the structural optimization cost is formulated as

$$J_s = \sum_i^{N_s} \left( \frac{M_p(\eta_i) - \widehat{M}_p(\eta_i)}{\widehat{M}_p(\eta_i)} \right)^2 + w_s \sum_i^{N_s} \left( \frac{K_q(\eta_i) - \widehat{K}_q(\eta_i)}{\widehat{K}_q(\eta_i)} \right)^2, \quad p \in \mathcal{S}_M, q \in \mathcal{S}_K, \quad (19)$$

where  $w_s$  is a tuning weight,  $M_p$  and  $K_q$  are elements of the mass and stiffness matrices, and the sets  $\mathcal{S}_M$  and  $\mathcal{S}_K$  identify the elements that should be considered within the generally fully populated symmetric mass and stiffness matrices. The first term in the cost aims at the matching of the scaled target mass distribution, while the second at the stiffness distribution. Vector  $\mathbf{m}_s$  indicates the matching equality constraints. They may include the matching of a desired number of natural frequencies  $\omega_i = \widehat{\omega}_i$ , and the matching of a desired number of mode shapes and/or static deflections  $\mathbf{u}_i(\eta_i) = \widehat{\mathbf{u}}_i(\eta_i)$  at a given number of spanwise stations  $\eta_i$ . Finally, vector  $\mathbf{c}_s$  specifies the additional design inequality constraints. These constraints express all other necessary and desired conditions that must be satisfied in order for the structural design to be viable, and in general include maximum stresses and strains for integrity, maximum tip deflection for safety, buckling, manufacturing and technological conditions.

It should be noted that the matching of the scaled beam stiffness and mass distributions —if it can be achieved— is an extremely powerful condition. In fact, a geometrically exact non-linear beam model is fully characterized entirely in terms of its reference curve, stiffness and mass matrices (Bottasso and Borri, 1998). This means that exactly matching all of these quantities would ensure the same non-linear structural dynamic behavior of the full-scale target. As shown later, this is not always possible because of limits due to technological processes, material characteristics, chosen configuration of the scaled model, etc. In this case, there is a partial match between the full-scale and scaled beam models, and the sets  $\mathcal{S}_M$  and  $\mathcal{S}_K$  include only some elements of the mass and stiffness matrices. When this happens, additional matching constraints can help in ensuring as similar a behavior as possible between the scaled and full-scale structures, for example by including static deflections and/or modal shapes, as shown later.

#### 4 Application and results: subscaling of a ~~10-MW~~ 10 MW rotor

The two strategies of straightforward zooming and aerostructural redesign are applied here to the subscaling of a ~~10-MW~~ 10 MW machine, developed in Bottasso et al. (2016) as an evolution of the original Denmark Technical University (DTU) ~~10-MW~~ 10 MW reference wind turbine (Bak et al., 2013). The main characteristics of the turbine are reported in Table 2. Some of the principal blade characteristics are given in Table 3, which reports the position of the airfoils, whereas Table 4 details the blade structural configuration and Table 5 summarizes the material properties.

Three different subscalings are considered here. The first ~~sub-seale~~ subscale model, denominated W-model, is based on the German Winsent test site (ZSW, 2016), which is equipped with two ~~750-kW~~ 750 kW turbines with a rotor diameter of 54 m (ZSW, 2017). The reference rotor blades are scaled down to match the span of the Winsent blades; reblading one of the Winsent turbines yields a ~~sub-seale~~ subscale model of the full-scale ~~10-MW~~ 10 MW turbine suitable for field testing. The second model, denominated S-model, is based on the SWiFT test site, which is equipped with Vestas V27 turbines. Here, the full-scale rotor is scaled down to a diameter of 27 m. Finally, the T-model is a wind tunnel model with a rotor diameter of 2.8 m,

**Table 2.** Principal characteristics of the full-scale ~~10-MW~~10 MW wind turbine (Bottasso et al., 2016).

| Data                           | Value                                    | Data                                    | Value                                       |
|--------------------------------|------------------------------------------|-----------------------------------------|---------------------------------------------|
| Wind class                     | IEC 1A                                   | Rated electrical power                  | 10.0 MW                                     |
| Hub height [H]                 | 119.0 m                                  | Rotor diameter [ <u>D</u> ]             | 178.30 m                                    |
| Cut-in wind speed [ $V_{in}$ ] | 4 <del>m/s</del> <u>ms</u> <sup>-1</sup> | Cut-out wind speed [ $V_{out}$ ]        | 25 <del>m/s</del> <u>ms</u> <sup>-1</sup>   |
| Rotor cone angle [ $\Xi$ ]     | 4.65 deg                                 | Nacelle uptilt angle [ $\Phi$ ]         | 5.0 deg                                     |
| Rotor solidity [ $\Sigma$ ]    | 4.66%                                    | Max blade tip speed [ $v_{tip_{max}}$ ] | 90.0 <del>m/s</del> <u>ms</u> <sup>-1</sup> |
| Blade mass                     | 42,496 kg                                | Tower mass                              | 617.5 ton                                   |

**Table 3.** Spanwise position of the airfoils of the blade of the ~~10-MW~~10 MW machine.

| Airfoil    | Thickness | Position | Airfoil    | Thickness | Position |
|------------|-----------|----------|------------|-----------|----------|
| Circle     | 100.0%    | 0.0%     | FFA-W3-301 | 30.1%     | 38.76%   |
| Circle     | 100.0%    | 1.74%    | FFA-W3-241 | 24.1%     | 71.87%   |
| FFA-W3-480 | 48.0%     | 20.80%   | FFA-W3-241 | 24.1%     | 100.00%  |
| FFA-W3-360 | 36.0%     | 29.24%   |            |           |          |

**Table 4.** Main structural characteristics of the blade of the ~~10-MW~~10 MW machine.

| Component            | From (% span) | To (% span) | Material type |
|----------------------|---------------|-------------|---------------|
| External shell       | 0             | 100         | Tx GFRP       |
| Spar caps            | 1             | 99.8        | Ux GFRP       |
| Shear web            | 5             | 99.8        | Bx GFRP       |
| Third shear web      | 22            | 95          | Bx GFRP       |
| TE/LE reinforcements | 10            | 95          | Ux GFRP       |
| Root reinforcement   | 10            | 99.8        | Balsa         |
| Shell and web core   | 5             | 99.8        | Balsa         |

**Table 5.** Mechanical properties of the materials of the blade of the ~~10-MW~~ 10 MW machine.

| Material type | Longitudinal elasticity modulus [MPa] | Transversal elasticity modulus [MPa] | Density [ <del>kg/m<sup>3</sup></del> <u>kgm<sup>-3</sup></u> ] |
|---------------|---------------------------------------|--------------------------------------|-----------------------------------------------------------------|
| Tx GFRP       | 21,790                                | 14,670                               | 1,845                                                           |
| Ux GFRP       | 41,630                                | 14,930                               | 1,940                                                           |
| Bx GFRP       | 13,920                                | 13,920                               | 1,845                                                           |
| Balsa         | 50                                    | 50                                   | 110                                                             |

which is similar to the scaled floating turbine tested in the Nantes wave tank ~~within in~~ the INNWIND.EU project (Azcona et al., 2016).

485 Table 6 reports the different geometric scaling factors and a few additional key quantities of the three ~~sub-seale~~ subscale models. For all, Froude scaling is used, which sets the timescale factor as previously explained. The application of the scaling laws to the full-scale turbine results in the characteristics listed in Table 7. Independent of the approach chosen to define the internal and external shape, the scaled models must fulfill these conditions to correctly mirror the dynamic behavior of the full-scale wind turbine.

**Table 6.** Some key scaling factors for the W-, S- and T-models.

| Quantity    | Scaling factor | W      | S        | T         |
|-------------|----------------|--------|----------|-----------|
| Length      | $n_l$          | 1:3.30 | 1:6.60   | 1:63.68   |
| Time        | $\sqrt{n_l}$   | 1:1.82 | 1:2.57   | 1:7.98    |
| Mass        | $n_l^3$        | 1:36   | 1:288    | 1:258,214 |
| Rotor speed | $\sqrt{n_l}$   | 1:1.82 | 1:2.57   | 1:7.98    |
| Wind speed  | $\sqrt{n_l}$   | 1:1.82 | 1:2.57   | 1:7.98    |
| Reynolds    | $n_l^{3/2}$    | 1:6    | 1:16.97  | 1:508     |
| Stiffness   | $n_l^5$        | 1:392  | 1:12,558 | 1:32,360  |

The gravo-aeroservoelastic scaling laws lead to very light and flexible ~~sub-seale~~ subscale blades. For instance, the standard 490 blades of the V27 weigh 600 kg (Vestas, 1994)~~;~~ which is four times more than the gravo-aeroservoelastically scaled blades of the S-model. It should however be remarked that this ratio would be smaller for a modern blade, since the V27 was designed more than 25 years ago and its blades are heavier than the ones based on contemporary technology.

In the next sections, the external and internal shape of each blade is designed based on the most suitable strategy for each size.

**Table 7.** Gravo-aeroservoelastic scaling requirements for the W-, S- and T-models.

|                               | Data | Full scale | W      | S      | T    |
|-------------------------------|------|------------|--------|--------|------|
| Diameter [m]                  |      | 178.3      | 54.0   | 27.0   | 2.8  |
| Hub height [m]                |      | 119.0      | 36.04  | 18.02  | 1.87 |
| Total blade mass [kg]         |      | 42,496     | 1,180  | 148    | 0.16 |
| Rotor speed [rpm]             |      | 8.9        | 16.2   | 22.9   | 71.1 |
| TSR for max $C_P$ [-]         |      | 7.2        | 7.2    | 7.2    | 7.2  |
| Reynolds [-]                  |      | 1E+7       | 1.7E+6 | 5.9E+5 | 2E+4 |
| First flapwise frequency [Hz] |      | 0.57       | 1.04   | 1.46   | 4.52 |
| First edgewise frequency [Hz] |      | 0.72       | 1.31   | 1.85   | 5.77 |

495 **4.1 Aeroservoelastic and design tools**

The aeroservoelastic models are implemented in Cp-Lambda (Bottasso et al., 2012). The code is based on a multibody formulation for flexible systems with general topologies described in Cartesian coordinates. A complete library of elements, including rigid bodies, nonlinear flexible elements, joints, actuators and aerodynamic models is available, as well as sensor and control elements.

500 The aerodynamic characteristics of the blade are described through lifting lines, including spanwise chord and twist distribution and aerodynamic coefficients. The code is coupled with aerodynamic models based on the BEM theory, formulated according to stream-tube theory with annular and azimuthally-variable axial and swirl inductions, unsteady corrections for root and blade tip losses as well as a dynamic stall model.

The tower and rotor blades are modeled by nonlinear geometrically-exact beams of arbitrary initially undeformed shapes, 505 which are bending, shear, axial and torsion deformable. The structural and inertial characteristics of each beam section are computed with ANBA (Giavotto et al., 1983), a 2D finite-element cross-sectional model. Finally, full-field turbulent wind grids are computed with TurbSim (Jonkman et al., 2009) and used as input flow conditions for the aeroservoelastic simulations.

Cp-Max (Bortolotti et al., 2016) is a design framework wrapped around Cp-Lambda, which implements optimization algorithms to perform the ~~purely aerodynamic and structural optimizations of a rotor. The two aerodynamic and structural~~ 510 ~~loops are nested within an outer loop that performs the~~ coupled aerostructural design optimization of the blades and, optionally, of the tower. For the present work, the code was modified to implement also the scaled design matching optimizations defined by Eqs. (15) and (18). All optimization procedures are solved with a sequential quadratic programming algorithm, in which gradients are computed by means of finite differences.



## 4.2 External shape design

515 For all three models, the design of the ~~sub-scale-subscale~~ external blade shape aims at replicating the aerodynamic characteristics of the full-scale rotor, including its wake. As long as the Reynolds numbers are sufficiently large, a zooming-down approach is clearly the simplest strategy for designing the external shape of a scaled blade.

Airfoil FFA-W3-241 equips the outermost part of the full-scale blade (see Table 3). Its performance at the three typical Reynolds numbers of the full-scale, W- and S-models was computed with ANSYS Fluent (ANSYS, Inc., 2019). The results  
520 are reported in Fig. 1. The performance of the airfoil is clearly affected by the Reynolds number, with a particularly significant drop in efficiency for the lowest Reynolds case. Notwithstanding these Reynolds effects, the zooming-down approach is selected for the W- and S-models, ~~as efficiency is still relatively high, since the airfoils are still performing well at their corresponding typical subscale Reynolds. A redesign approach with alternative airfoils was not attempted here, and would probably lead only to marginal improvements of the aerodynamic performance.~~

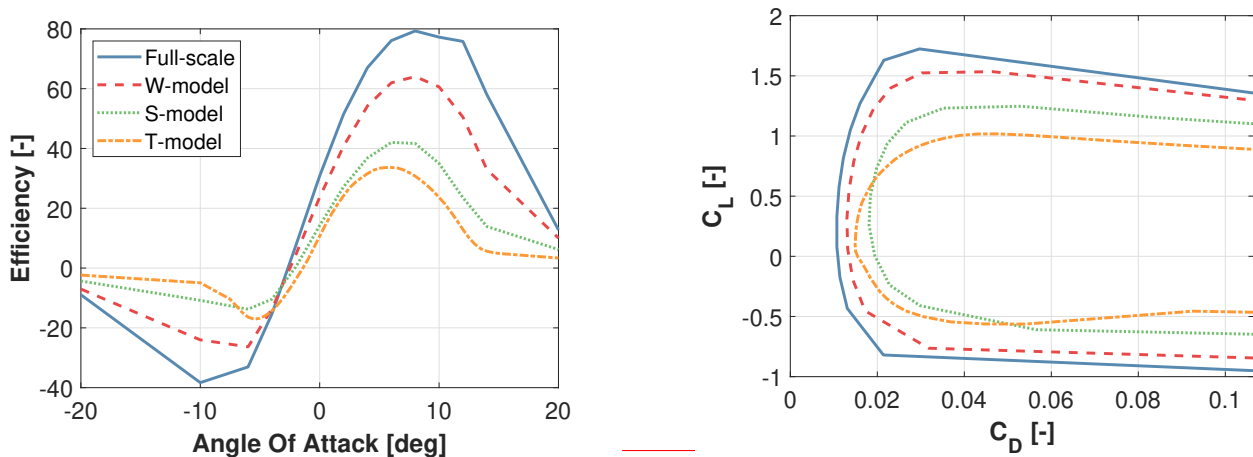

**Figure 1.** Aerodynamic characteristics of the FFA-W3-241-airfoil ~~for at the typical Reynolds-numbers outermost part of the blades at the corresponding Reynolds number. The full-scale, W- and S-models are equipped with the FFA-W3-241 airfoil. The T-model is designed with the RG14 airfoil.~~ Left: efficiency,  $E = C_L/C_D$ , vs. angle of attack. Right: polar curves, i.e.  $C_L$  vs.  $C_D$ .

525 On the other hand, for the small geometric scaling factor of the T-model, the aerodynamic redesign approach is necessary. In fact, ~~at these typical Reynolds numbers, the FFA-W3-241 airfoil behaves very poorly~~ general, smooth airfoils present a large reduction in aerodynamic efficiency below a critical Reynolds of about 70,000 (Selig et al., 1995). Efficient profiles specifically developed for low Reynolds applications are generally necessary in order to get a good matching of the full-scale aerodynamic performance. As an alternative to the original airfoil, the 14%-thick airfoil RG14 (Selig et al., 1995) is selected, because its  
530 aerodynamic characteristics at the scaled Reynolds are in reasonable agreement with the ones of the original airfoil at its full-scale Reynolds ~~-(Fig. 1).~~ The blade is then completely redesigned, using the RG14 airfoil along its full span.

The blade shape is parameterized by means of chord and twist spanwise distributions. The design problem is formulated as the maximization of the power coefficient at the design TSR  $\lambda_d$  of the full-scale rotor, ~~while a nonlinear constraint enforces solving Eq. (15) with the cost given by Eq. (16) for  $N_{CP} = 1$  and  $\lambda_i = \lambda_d$ . The nonlinear constraints expressed by Eq. (17)~~  
 535 ~~enforce~~ the same spanwise nondimensional circulation distribution of the full-scale blade.

Figure 2 shows the external shapes of the full-scale blade and the three ~~sub-scale~~ subscale models in terms of chord, relative thickness, twist and Reynolds number. Clearly, the shape curves for the W- and S-models overlap with the full-scale ones, because zooming is used in these two cases, as previously explained.

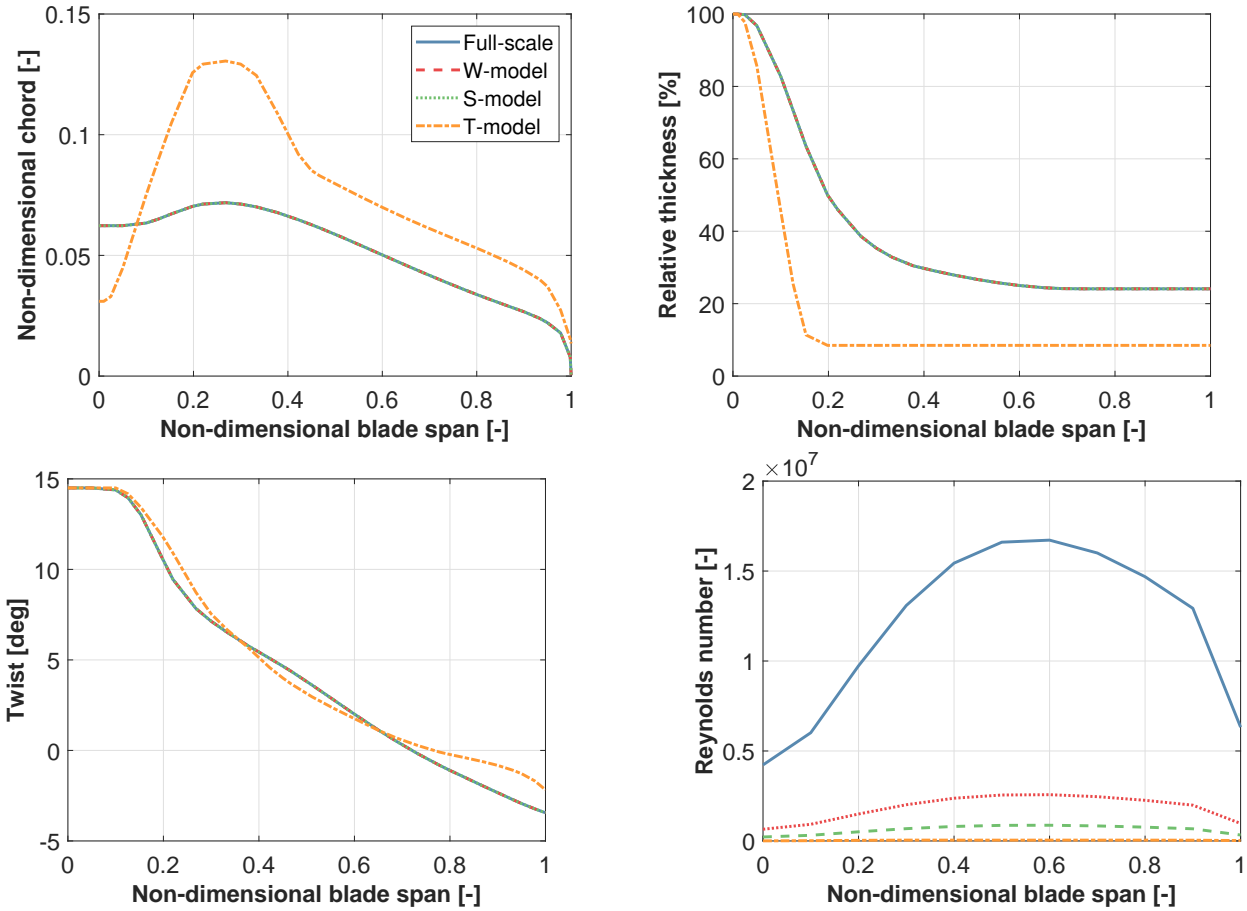

**Figure 2.** Nondimensional chord, relative thickness, twist and Reynolds number vs. spanwise position, for the full-scale blade and its three ~~sub-scale~~ subscale models.

The three subscale models have the same TSR in region II as the full-scale machine, and the correspondingly subscaled rated rotor speeds. The rated wind speeds do not exactly match the subscale ones, on account of the differences in the Cp-TSR curves caused by Reynolds effect.

540

### 4.3 Design of the internal structure

The definition of the internal structure has to achieve a few goals: the matching of the full-scale aeroelastic behavior, the integrity of the blade under loading and the feasibility of the manufacturing process. In the next two sections, the zooming-down and the redesign approaches are applied to the structure of the three ~~sub-scale~~subscale blades.

#### 4.3.1 Limits of the zooming-down approach

The straightforward zooming-down approach can be applied to the internal structure of the W- and S-model blades, as their external geometrical shape has also been defined following this approach. The resulting structures satisfy all scaling constraints, but present some critical ~~aspects~~challenges.

550 First, the ~~components-thicknesses~~thicknesses of some of the components are unrealistically low. The blade root of the W-model is, for example, only 20 mm thick and is therefore unable to accommodate the root-bolted connections. Furthermore, the scaling of the outer shell skin leads to a laminate thickness of less than one ply, ~~which is unrealistic to manufacture~~. The third web of the ~~full-scale~~S-model blade is also extremely thin (less than 1 mm) and very close to the trailing edge.

555 Additionally, the scaled structure requires materials characterized by very peculiar mechanical properties. Indeed, as previously shown, the scaling laws require the modulus of elasticity to obey the scaling  $E_M = E_P n_l$ , and the material density to be  $\rho_{mM} = \rho_{mP}$ . For example, the outer shell of the W-model blade requires an elasticity modulus of 6.6 GPa and a density of ~~1,845 kg/m<sup>3</sup>~~kgm<sup>-3</sup>, which are not typical values of conventional materials (~~cf.~~see Fig. 3). Finally, nonstructural masses, such as glue, paint and lightning protection, cannot be exactly zoomed down by geometric scaling, and need to be treated separately.

One may try to relax some of these hurdles by increasing the necessary component thicknesses and choosing materials with 560 mechanical properties that compensate this increase. For example, a threefold increase of the skin thickness in the W-model would be able to accommodate the root-bolted connection and would satisfy manufacturing tolerances. To meet the mass and inertia constraints, a material should be used that has a lower density,  $\rho_{mM} = \rho_{mP}/3$ , and a lower-elasticity modulus,  $E_M = E_P n_l/3$ . Figure 3 reports Ashby's diagram of Young's modulus vs. density (Cambridge University, 2003). ~~On~~In this plot, the values corresponding to the outer shell skin materials have been marked with  $\times$  symbols. A red symbol indicates the 565 full-scale blade, a yellow symbol is used for the W-model considering the exact zooming-down approach, whereas a green symbol indicates the solution with a threefold thickness increase. It should be noted that, although the properties of the scaled models do correspond to existing materials, these are typically not employed for the manufacturing of blades. Therefore, their actual use for the present application might indeed pose some challenges.

Overall, the zooming-down approach for the structural design is not really straightforward and is significantly more com- 570 plicated than in the case of the aerodynamic design. An alternative is offered by a complete redesign of the internal structure, which is illustrated in the next section.

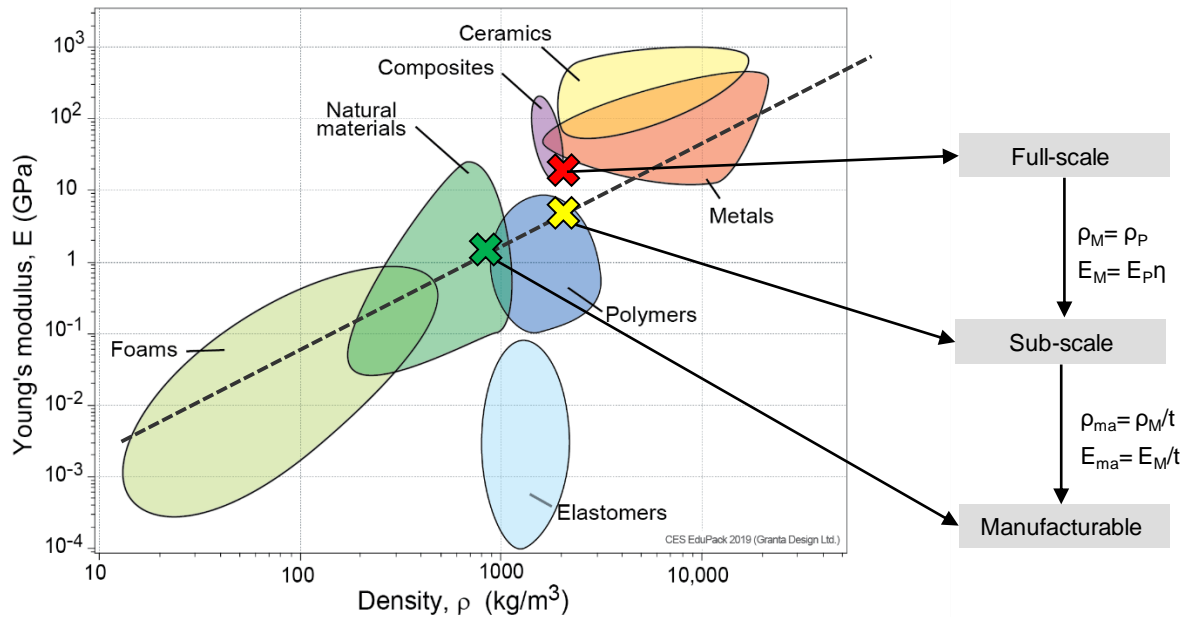

**Figure 3.** Ashby's diagram of Young's modulus vs. density (Cambridge University, 2003), and the outer shell skin materials for the W-model.

[Chart created using CES EduPack 2019, ANSYS Granta ©2020 Granta Design.](#)

#### 4.3.2 Redesign of the W- and S-models

An alternative to the zooming-down approach ~~consists of~~ [is the redesign of the internal structure](#). This consists of a typical blade design process, subjected to additional constraints that enforce the desired scaling relationships ~~but, crucially, also to all~~ [other conditions that are necessary to make the design viable](#). For example, here a lower bound to the thickness of all structural components is set to 1 mm, while a minimum thickness of 60 mm is assumed at the root to accommodate the bolted connection of the W- and S-models.

Additionally, one has a larger freedom in the choice of materials. For the present applications, the glass-fiber-reinforced plastic (GFRP) composites of the full-scale blade appear to be suitable choices also for the W-model. On the other hand, these materials are too stiff for the S-model, due to its smaller geometric scaling. An alternative ~~material~~ [family of thermoplastic materials that have typical stiffness values](#) between 1 – 3 GPa and densities between 900 and 1,400  $\text{kg/m}^3$   [\$\text{kgm}^{-3}\$](#)  (Brondsted et al., 2005). Although not strictly of interest here, thermoplastics also have interesting advantages over thermosets, such as reduced cycle times, lower capital costs of tooling and equipment, smaller energy consumption during manufacturing and enhanced recyclability at the end of their life (Murray et al., 2018).

During the design phase of the ~~sub-scale~~ [subscale](#) models, a more careful attention can also be paid to the distributions of nonstructural masses.

Masses from shell and sandwich cores must be recomputed for the new scaled structure in order to prevent the buckling of the sandwich panels. Additional masses from surface finishing and painting are also recomputed according to the surface of the external shell. In fact, if a zooming-down strategy is chosen for the design of the external geometry, these masses will scale with the length scale factor.

Masses from resin uptake in the outer shell and shear webs are recomputed for the scaled structure assuming a constant area density. Indeed, this value does not change from the full to the sub scale, since it depends on the material and manufacturing process. A different assumption is taken for the masses of bonding plies and adhesive along the shear webs, leading and trailing edge. Since these masses are chordwise dependent, the linear density of these materials in the ~~sub-scale~~ subscale size must be corrected by the length scale factor.

Finally, the linear density of the lightning protection system is assumed to be constant for all sizes.

The structural design is formulated as ~~a minimum weight problem, subjected to typical blade design constraints, including maximum stresses and strains, fatigue, thickness and thickness rate. Maximum tip deflection is not considered, because both elastic deflections and rotor-tower clearance are assumed to be correctly scaled. To match the scaled characteristics, additional constraints include mass distribution, tip displacement in flap and lag, the matching optimization problem expressed by Eq. (18). The cost function given by Eq. (19) considers the sole spanwise matching of the mass distribution, i.e. it neglects inertia terms in  $\mathcal{S}_M$  and uses  $w_s = 0$ . The matching constraints  $\mathbf{m}_s$  include the lowest three natural frequencies, and the lowest three natural frequencies~~ the static deflected shape of the outboard 40% section of the blade. This static condition was chosen to represent the maximum tip displacement resulting from turbulent simulations in power production for the full-scale machine (design load case DLC 1.1, see IEC (2005)). Finally, the additional design constraints  $\mathbf{c}_s$  include stresses, strains, fatigue and technological constraints in the form of bounds on thickness and thickness rate of change of the laminates.

~~For~~ The structural design for the W- and S-models is based on a typical thin-walled composite structure is assumed configuration, where the design variables are defined as the spanwise thicknesses of the skin, shear webs, spar caps and leading and trailing edge reinforcements. Given the smaller size of the scaled blades, one single shear web is used instead of the three used in the full-scale ~~10-MW~~ 10 MW model. Table 8 describes the mechanical properties of the materials used for these two blades, while Table 9 ~~specifies the use of these materials for the~~ associates the various structural elements with the materials.

**Table 8.** Mechanical properties of the materials used for the W- and S-model blades.

| Material type | Longitudinal elasticity modulus [MPa] | Transversal elasticity modulus [MPa] | Density [ $\text{kg/m}^3$ <u><math>\text{kgm}^{-3}</math></u> ] |
|---------------|---------------------------------------|--------------------------------------|-----------------------------------------------------------------|
| Bx GFRP       | 13,920                                | 13,920                               | 1,845                                                           |
| Ux GFRP       | 42,000                                | 12,300                               | 1,940                                                           |
| PMMA          | 2,450                                 | 2,450                                | 1,200                                                           |
| POM           | 5,000                                 | 5,000                                | 1,400                                                           |
| Balsa         | 50                                    | 50                                   | 150                                                             |

**Table 9.** Materials used for the structural components of the W- and S-model blades.

| Component            | From (% span) | To (% span) | Material type |         |
|----------------------|---------------|-------------|---------------|---------|
|                      |               |             | W-model       | S-model |
| External shell       | 0             | 100         | Bx GFRP       | PMMA    |
| Spar caps            | 10            | 95          | Ux GFRP       | POM     |
| Shear web            | 10            | 95          | Bx GFRP       | PMMA    |
| TE/LE reinforcements | 10            | 45          | Ux GFRP       | PMMA    |
| Shell and web core   | 10            | 95          | Balsa         | Balsa   |

For the S-model, the thermoplastic materials polymethyl methacrylate (PMMA) and polyoxymethylene (POM) are ~~used~~ chosen because of their lower stiffness. The use of polymer materials reduces the nonstructural masses, as the adhesive is no longer necessary. Due to the reduced fatigue characteristics of these materials, the blade lifetime is limited to 5 years. This is assumed to be acceptable in the present case, given the research nature of these blades. Constraints on maximum stresses and strains are satisfied with ample margin for these blades. However, the inclusion of a larger set of DLCs (including extreme events and parked conditions) might create more challenging situations, which could increase the requirements on material strength, possibly eventually leading to the selection of different materials.

Figure 4 reports the internal structure of the W- and S-models, as well as the overall mass distributions, including realistic nonstructural masses. The scaled mass distribution follows quite closely the reference one along the blade span, with the exception of the root because of the additional thickness that must be ensured to accommodate the bolted connection. The blade satisfies the scaling inertial and elastic constraints within a tolerance of less than 5%.

**4.3.3 Redesign of the T-model**

The very small size of the wind tunnel model blade prevents the use of a typical thin-walled solution. Following Bottasso et al. (2014) and Campagnolo et al. (2014), this scaled blade is not hollow, but presents a full cross section obtained by machining a foamy material. Two unidirectional spar caps provide the required flapwise stiffness distribution. The surface smoothness is obtained by a very thin layer of skin made of glue. Although Bottasso et al. (2014) and Campagnolo et al. (2014) considered different scaling laws, their blade design configuration was found to be ~~suitable~~ a suitable choice even in the present gravo-aeroservoelastic scaling exercise. The selection of appropriate materials represents a critical aspect of the problem, and the mechanical properties listed in the Cambridge University Materials Data Book (Cambridge University, 2003) were used to guide the material selection ~~process~~ for the spar caps and core. A rigid polymer foam is chosen as filler, because of its relatively high stiffness and lightness. For the spar caps, thermoplastic polymers are again found to be the most suitable solution. ~~Even even~~ though their stiffness-to-density ratio is much lower than materials traditionally used for spar caps, ~~such as carbon-fiber-reinforced-plastics, they are well-suited to this specific application.~~ Moreover, the use of thermoplastics allows for alternative and ~~easier manufacturing methods~~ simpler manufacturing processes, leading to a higher flexibility in the spar cap

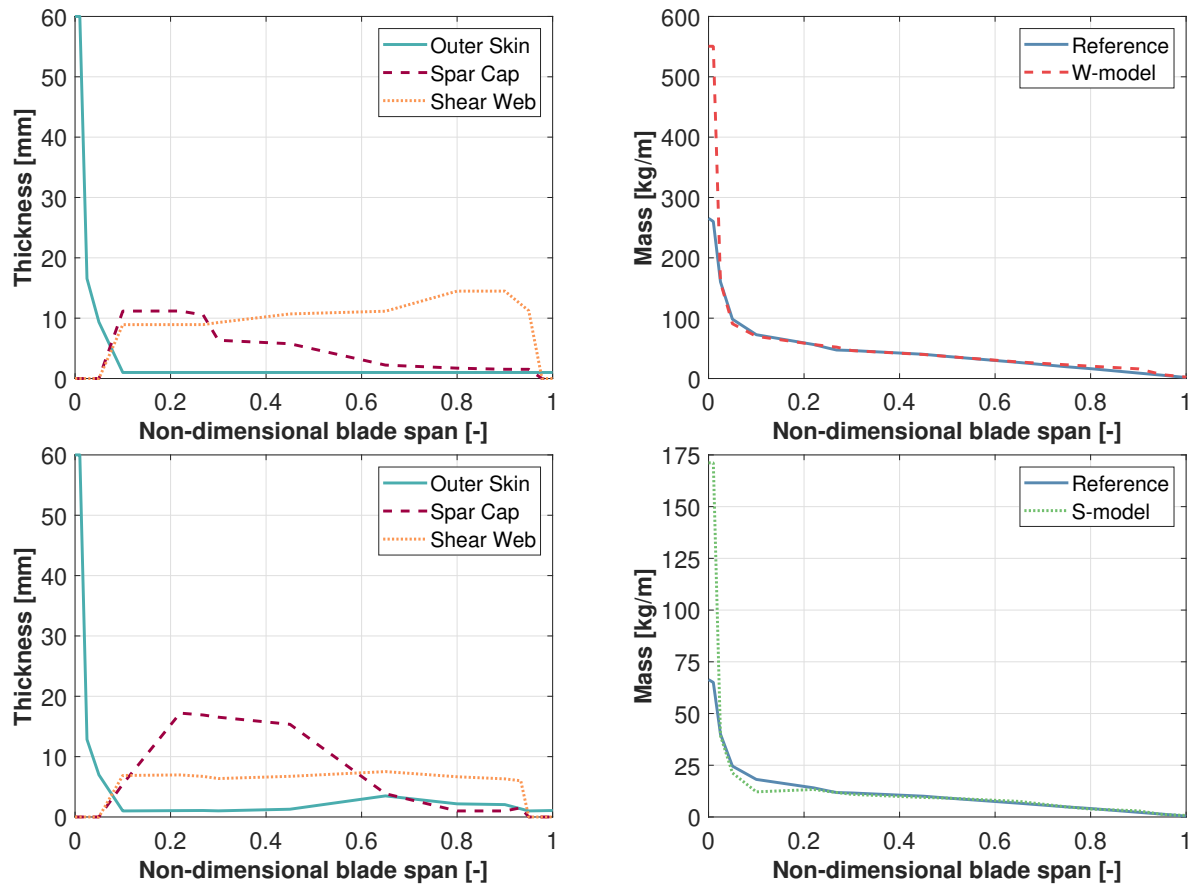

**Figure 4.** Thickness of the structural components and mass distribution for the W- (top) and S- (bottom) models. The label “reference” indicates the mass distribution of the full-scale blade, subscaled to the W- and S- scales.

design. From this family of materials, polypropylene is chosen because of its low stiffness modulus. Finally, the external shell is covered by a very thin layer of the epoxy structural adhesive ~~Scotch Weld AF 32~~ Scotch Weld AF 32 (3M, 2000).

The design variables are represented by the spanwise thickness and width of the two spars. The design ~~constraints include the spanwise mass and out-of-plane stiffness distributions, and the placement of the lowest four natural frequencies. The structural configuration~~ problem is formulated according to the constrained matching optimization expressed by Eq. (18). The cost function of Eq. (19) considers the spanwise mass distribution in  $\mathcal{S}_M$  and the flapwise stiffness distribution in  $\mathcal{S}_K$ . The matching constraints  $m_s$  include the lowest three natural frequencies, and the flapwise static extreme tip deflection. Both the cost and the constraints only consider the flapwise characteristics of the blade, because the structural configuration consisting

of a solid core and two spar caps ~~allows only~~ allows for a limited control of the edgewise characteristics. As a result, the scaled blade presents a higher edgewise stiffness than the full-scale reference.

Figure 5 reports the results of the design optimization. The desired matching of mass and flapwise stiffness is achieved, except at the blade root. Even though the placement of the first flapwise natural frequency with respect to the rotor speed is ensured, the constraint on the lowest edgewise natural frequency could not be exactly matched due to the large chord. ~~For the~~  
650 ~~inertial behavior, the~~ Small disparities in mass distribution introduce a difference of about 1% in the blade flapping inertia.

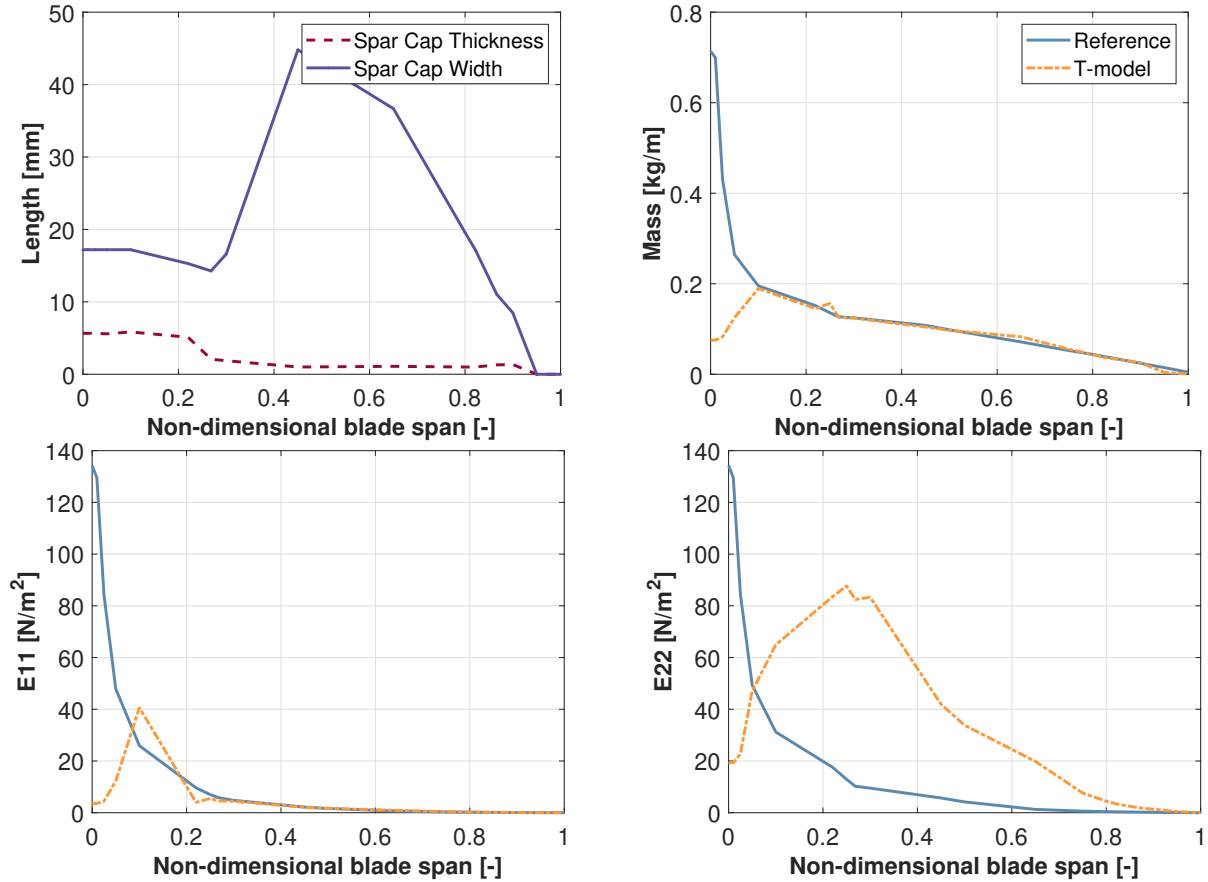

**Figure 5.** Spar caps thickness and width (left, top), mass distribution (right, top), flapwise stiffness distribution (left, bottom) and edgewise stiffness distribution (right, bottom) for the T-model. The label “reference” indicates the characteristics of the full-scale blade, subscaled to the T-model scale.

## 5 Performance comparison

In this section, the behavior of the scaled models is compared to the full-scale machine. The main goal here is to assess to which extent the ~~sub-scale~~ subscale models are capable of successfully mirroring relevant key characteristics and load trends of the full-scale reference.



655 The same collective-pitch/torque controller governs all machines. The controller uses a look-up table for torque to operate at ~~the rated TSR of the full-scale reference~~ rated TSR in region II, and a proportional-integral-derivative (PID) pitch loop to maintain constant rated power in region III. The ~~proportional-integral-derivative~~ PID gains used for the scaled models are obtained by ~~scaling-transforming~~ the ones of the full-scale machine using the scaling laws, and the regulation trajectory is adapted to each model to account for differences in the  $C_P$ -TSR curves. Notice that the scaling of gains is a conservative approach: in the case of an exact matching at scale of all aeroelastic characteristics of the turbines, the use of a scaled controller will ensure also identical closed-loop response. However, if the scaled models do not represent exactly the full-scale reference, which is invariably the case in practice, an ad hoc retuned controller (i.e., a controller specifically optimized for the scaled model) will in general have a better performance than the one obtained by the scaling of the gains. The choice of gain scaling instead of retuning was made here to consider a worst case scenario.

660

## 665 5.1 Relevant key indicators

The models are simulated in a power production state at five different wind speeds from cut-in to cut-out. The winds of the scaled simulations are obtained by velocity scaling the turbulent winds used for the full-scale machine (i.e. the integral space and timescales are both correctly scaled). The matching between the scaled and full-scale turbines is assessed with the help of 10 different indicators: annual energy production (AEP), maximum flapwise tip displacement (MFTD), maximum thrust at main shaft (ThS), maximum combined blade root moment (CBRM), maximum flapwise bending root moment (FBRM), maximum edgewise bending root moment (EBRM), and the Weibull-averaged damage equivalent loads (DEL) for ThS, CBRM, FBRM and EBRM.

670

### 5.1.1 Utility-scale models

As previously discussed, both the design of the external shape and of the internal structure may induce differences in the behavior of a scaled model with respect to its full-scale reference. To better understand the effects of these differences and their origins, three different sets of results are presented in Fig. 6.

675

The first plot (at top left) compares the indicators of the full-scale turbine with the ~~up-scaled~~ upscaled ones of the W- and S-models, ~~considering a zoomed-down external shape, including Reynolds effects according to CFD, and a zoomed-down internal structure. Both the internal structure and the external shape are obtained by zooming, and Reynolds effects are accounted for by CFD-computed polars.~~ Although a zoomed-down structure cannot really be a practical solution, ~~as discussed earlier,~~ as discussed earlier because of excessively thin structural elements or the need for peculiar material properties, this solution is shown here because it highlights the sole effects of the Reynolds mismatch. In other words, since this is a purely numerical study, the thicknesses and mechanical properties were used exactly as produced by scaling, resulting in a nearly exact satisfaction of the matching of all structural characteristics. Therefore, the differences of the indicators between the full-scale and scaled models shown in this plot can be entirely attributed to Reynolds effects. The full-scale and utility-size models are equipped with airfoil polars at different Reynolds computed with the CFD code ANSYS Fluent (ANSYS, Inc., 2019).

680

685

The second plot (at top right) compares the indicators for the W- and S-models with a zoomed-down external shape, but neglecting Reynolds effects, and a redesigned internal structure. Although Reynolds effects would, in reality, be present, by neglecting them ~~here—which~~ here—which is again possible because this is a purely numerical ~~study—one~~ study—one can assess from this solution the sole effects of the structural redesign on the matching of the indicators.

Finally, the third and last plot (bottom part of the figure) considers the solution obtained by zooming down the aerodynamic shape, considering Reynolds effects, and a redesigned internal structure. As argued earlier, this is indeed the solution that is practically realizable, and, therefore, these are the more realistic results of the set considered here. Hence, differences between the full-scale and scaled models are due to mismatches caused both by Reynolds and the redesign procedure.

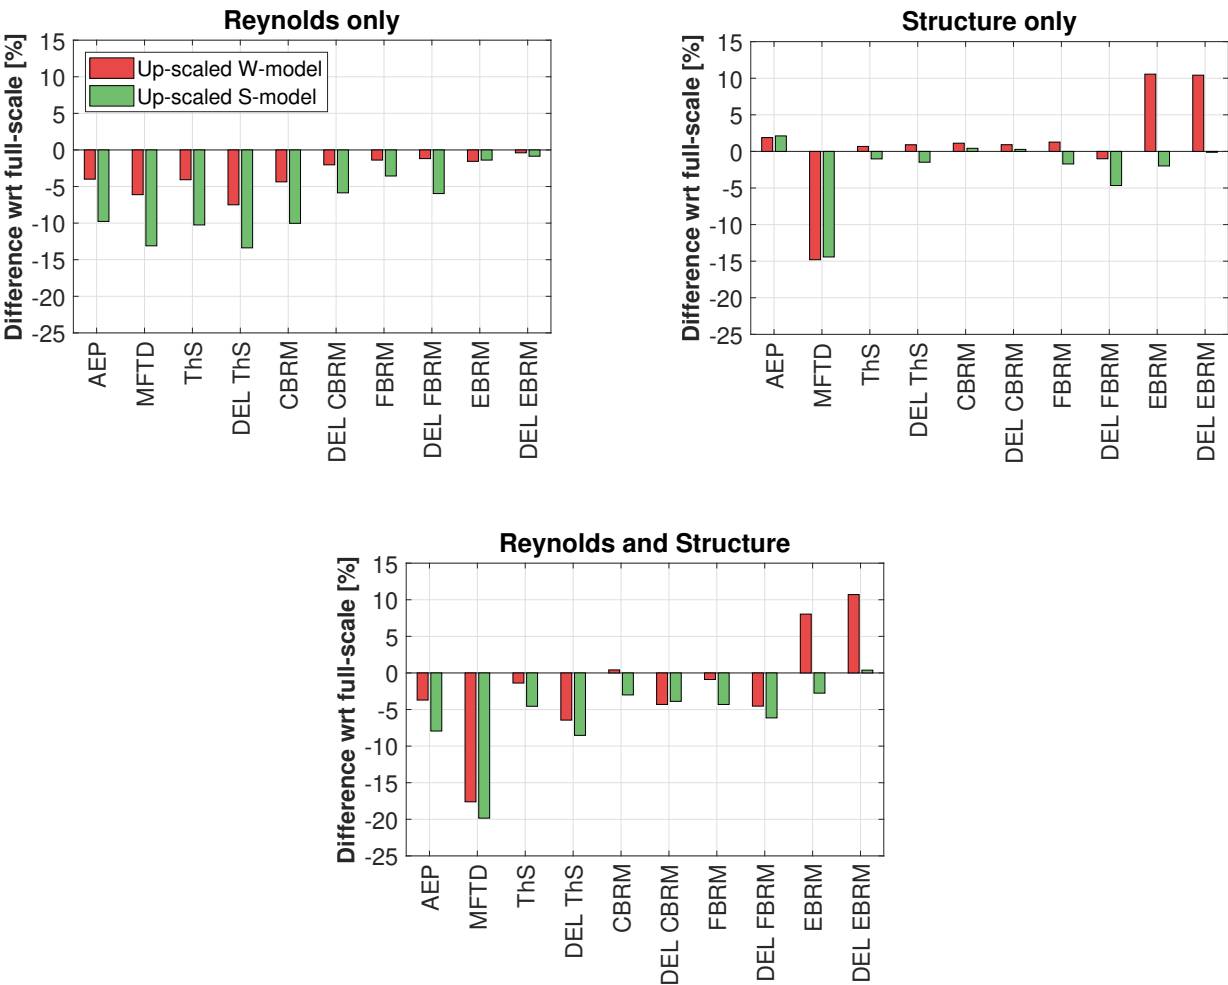

**Figure 6.** Changes with respect to full scale for several key indicators for the W- and S-models. Top left: effects exclusively due to Reynolds mismatch. Top right: effects exclusively due to structural redesign. Bottom: realistic solution considering both the effects of Reynolds mismatch and structural redesign.

As expected by the size difference, results shown in the first plot suggest a larger effect of the Reynolds mismatch for the S-model than for the W-model. This results in a drop in all indicators because of the decreased airfoil efficiency.

The second plot shows a similar matching for both models. Indeed, most of the key loads are matched within 5% for both the W- and the S-model. A larger difference between the two models is found for EBRM and DEL EBRM, which are only poorly  
 700 matched by the W-model, ~~while~~ whereas they are quite accurate for the S-model. The mismatch is due to a slightly higher sectional mass in the last 20% of the blade of the W-model, as shown in Fig. 4. A significant difference with respect to full scale is also observed for the maximum flapwise tip displacement of both the W- and S-models. This difference is caused by a slightly different dynamic behavior induced by mismatches in the flapwise and torsional stiffness distributions. Even though FBRM matches very well for both the W- and S-model at the root, these differences lead to a poorer match at sections toward  
 705 the blade tip, which in the end impacts MFTD.

Overall, both models are capable of matching the key indicators of the full-scale target reasonably well, considering both Reynolds effects and a redesigned structure.

### 5.1.2 Wind tunnel model

The behavior of the T-model is compared with the ~~10-MW~~ 10 MW baseline in Fig. 7. The additional indicator maximum  
 710 edgewise tip deflection (METD) is considered in this case. The polars for the T-model are computed with Xfoil (Drela, 2013).

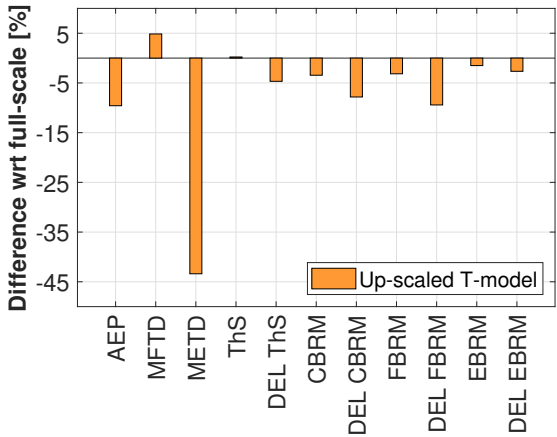

**Figure 7.** Comparison between full-scale key indicators and the ~~up-sealed~~ upscaled ones of the T-model.

The comparison shows satisfactory behavior of the wind tunnel model for most key indicators, notwithstanding the very different Reynolds numbers (about 1E+7 for the full-scale reference, and about 2E+4 for the T-model). As expected, the largest mismatch is found for the maximum edgewise tip displacement. This can be justified by the inability of the structural design variables (limited to the two caps) in controlling the edgewise stiffness.

Scaled models can also be used to capture trends, instead of absolute values. Indeed, the goal of scaled testing is often to understand the trends generated on some metric by, for example, a control technology, or by a particular operating condition or other factors, ~~while~~ whereas the exact quantitative assessment of the induced effects must be left to a final full-scale verification.

As an example of the analysis of trends, the scaled models designed here are used to explore changes in loading between  
 720 unwaked and waked inflow conditions. To this end, the full-scale turbine is simulated with an average inflow velocity of  $7 \text{ m/s}$ , considering a shear exponent of 0.2 and a turbulence intensity of 8%. The wake deficit generated by an upstream ~~10-MW~~ 10 MW machine is then added to this inflow (~~Bottasso et al., 2017~~), in order to simulate a waked condition. The wake is modeled by the superposition of a turbulent wind grid generated with TurbSim (Jonkman et al., 2009) and the first order solution of the deficit of the Larsen model (EWTSII model) (Bottasso et al., 2017). The downstream turbine is located at a  
 725 longitudinal downstream distance of 4 D from the upstream machine, and its lateral distance from the wake center is varied from -1.25 D (right, looking downstream) to 1.25 D (left), realizing different degrees of wake-rotor overlap. The scaled models are simulated by velocity-scaling the full-scale inflows. The key indicators considered are AEP, ThS, FBRM and DEL for CBRM, FBRM and EBRM.

Figure 8 reports ~~the changes in the indicators for the different conditions and the different models.~~ changes in key indicators  
 730 at several degrees of wake overlap with respect to unwaked inflow conditions. The full-scale machine presents the largest reduction in AEP and ThS in full wake overlap. An asymmetrical load trend of the DELs for FBRM, EBRM and CBRM is visible when the rotor is operating in partial wake. This behavior is mostly due to the rotor uptilt angle, which introduces an additional velocity component in the rotor plane. In fact, for a clockwise (when looking downstream) rotating rotor, this extra velocity component increases the in-plane velocity at the blade sections when the blade is on the right side of the rotor (i.e., during the downstroke; here left and right are defined for an observer looking downstream). Additionally, when a wake impinges on the right side of the rotor, the out-of-plane velocity component decreases, because of the wake deficit. Both of these effects tend to decrease the angle of attack at the blade sections. On the other hand, when a wake impinges on the left portion of the rotor, the effect of the decreased out-of-plane component is in part balanced by the also decreased in-plane component. Because of this different behavior, larger load fluctuations (and hence higher fatigue loads) are observed for right  
 735 wake impingements than for left ones. A similar effect is caused by the elasticity of the tower: under the push of the thrust, the tower bends backwards that in turn tilts the rotor upward, adding to the previously described phenomenon. Other minor effects are also due to the elastic deformations caused by gravity, which again contribute to breaking the symmetry of the problem.

Overall, the largest scaled models follow the trends very well, with the S-model performing slightly better than the W-model. Indeed, the W-model is better than the S-model when looking at Weibull-averaged quantities (Fig. 6), but the S-model presents  
 745 a slightly superior matching of blade loads at the specific speed at which the load trend study is performed.

The trends are also reasonably captured by the smaller-scale T-model, but with significant differences in DEL FBRM. Specifically, there is ~~a significant~~ an overestimation of this quantity around  $-0.5$  D lateral wake center ~~positions~~ position. A detailed analysis of the results revealed this behavior to be caused by the blade operating at angles of attack close to the stalling

point. This indicates another possible limit of models with large-scale factors, whose airfoils may have very different stall and post-stall behavior than their full-scale counterparts.

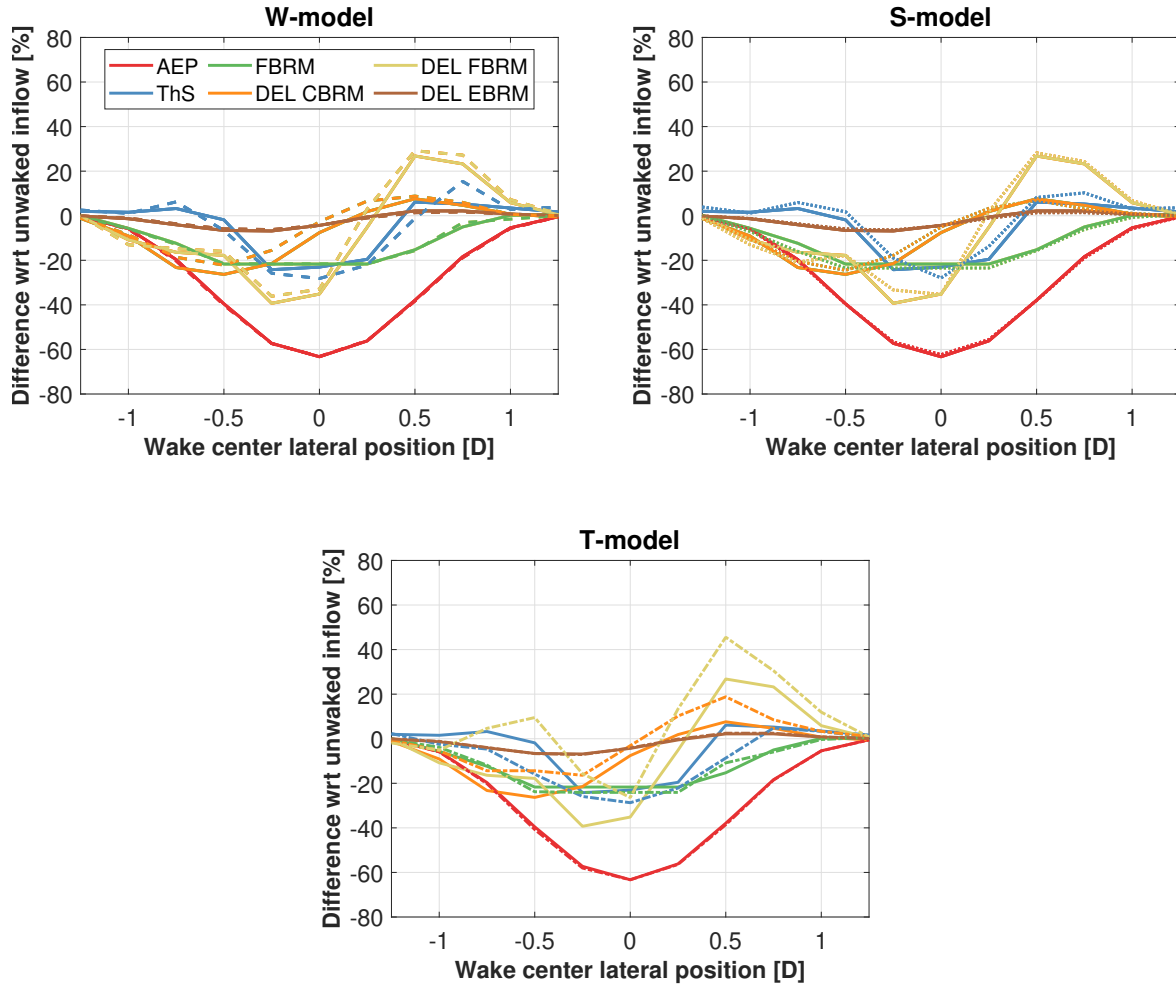

**Figure 8.** Comparison of key indicators between unwaked and waked inflows, for different lateral distances from the wake center. The solid line corresponds to the full-scale model. Top left: W-model (dashed line). Top right: S-model (dotted line). Bottom: T-model (dash-dotted line).

## 6 Conclusions

This paper analyzed the scaling conditions that should be met by a sub-seale-subscale model to match a full-scale reference in terms of its full aeroservoelastic response. The analysis has shown that many relevant key aspects of the steady and unsteady response of a machine, considered as flexible, can indeed be matched. Part of this analysis can also be used to understand

755 expected changes due to ~~up-sealing~~upscaling, which can be useful in the design of larger rotors. To the authors' knowledge, this is one of the most comprehensive analysis of the problems of scaling wind turbines presented thus far.

Within this framework, this paper has considered two alternative ways of designing a scaled rotor. The first is based on the idea of exactly zooming down the full-scale reference to obtain the ~~sub-seale~~subscale model. An alternative strategy is to completely redesign the rotor, both from an aerodynamic and structural point of view. This produces a scaled blade that,  
760 although possibly very different from the full-scale one, matches some of its key characteristics as closely as possible.

These two alternative strategies have been tested on the gravo-aeroservoelastic scaling of a conceptual ~~10-MW~~10 MW blade to three different ~~sub-seale~~subscale models: two utility-scale ones to be used for the reblading of small existing turbines, and one for equipping a very small model turbine for conducting experiments in the controlled environment of a wind tunnel.

The following conclusions can be drawn from the application of the two strategies to these three different scaling problems.  
765 The simplest strategy to design the external shape of utility-scale blades is the straightforward zooming-down approach, as long as the ~~sub-seale~~subscale Reynolds is sufficiently high. This strategy benefits from a simple implementation and leads to an acceptable match of the blade aerodynamic performance. However, when the blade aerodynamic performance is compromised by the Reynolds ~~mismatch—which mismatch~~—which is the typical case of wind tunnel ~~models—the models—the~~ alternative but more complex strategy of redesigning the aerodynamic shape becomes preferable if not altogether indispensable. Special  
770 low-Reynolds airfoils may be used to mitigate the effects caused by the reduced Reynolds regime. However, different behavior at and around stall might lead to different loads when operating at large angles of attack.

The straightforward zooming down of the blade internal structure is instead typically very difficult for all scaling ratios. In fact, the need for materials of ~~quite peculiar~~unusual characteristics and the nonscalability of nonstructural masses unfortunately hinder the applicability of this simple approach. An alternative is found in the structural redesign strategy, which offers more  
775 flexibility at the price of increased complexity. Even here, however, the problem is nontrivial. For example, materials may play a critical role, due to the very flexible nature of some of these scaled blades.

The aeroservoelastic analyses conducted herein have shown that, in general, it is not possible to exactly match all the characteristics of a full-scale machine with a ~~sub-seale~~subscale model. However, with the proper choices, some key indicators are nicely captured. In addition, changes in operating conditions are represented quite well even at the smaller scale. For  
780 example, it was shown that changes in loading from an unwaked to a waked condition are ~~captured quite well~~accurately represented by all scaled models.

~~In reality, much of what has been revealed by the initial scaling analysis remains to be demonstrated. For example, it was shown that with the proper scaling one can in principle represent some key characteristics of the behavior of the wake to scale. However, wake behavior was here completely ignored. In addition, it was also shown that some effects, such as rotational augmentation and unsteady aerodynamics, can be matched by a properly designed scaled model. Such claims can only be substantiated with much higher-fidelity simulations than the ones conducted here, as, for example, by using blade-resolved CFD, or with ad hoc experiments. From this point of view, the present work can only be regarded as a very preliminary step, and much remains to be done to fully comprehend and command the art of designing scaled models of reality. This work has exclusively focused on the wind turbine, and the effects of scaling have been quantified for the aerodynamic performance and~~  
785 This work has exclusively focused on the wind turbine, and the effects of scaling have been quantified for the aerodynamic performance and

790 loading of the rotor. The recent study of Wang et al. (2020) expands this analysis by considering the effects of scaling on wake  
behavior. Even in that case the conclusion is that properly scaled models can produce very realistic wakes.

This work is funded in part by the WINSSENT project (FKZ: 0324129F), which receives funding from the German Federal  
Ministry for Economic Affairs and Energy (BMWi). The authors would like to thank Chengyu Wang and Daniel J. Barreiro  
of the Technical University of Munich for the computation of the airfoil polars using CFD for multiple Reynolds numbers.  
795 Additionally, credit goes to Eric Loth of the University of Virginia for having introduced the authors to the zooming approach,  
and to Filippo Campagnolo of the Technical University of Munich for the fruitful discussions and support. It is the hope of the  
authors that these results will increase the confidence on scaled testing, in the belief that scaled model have a significant role  
to play in the advancement of wind energy science.

This work was authored in part by the National Renewable Energy Laboratory, operated by Alliance for Sustainable Energy,  
800 LLC, for the U.S. Department of Energy (DOE) under Contract No. DE-AC36-08GO28308. Funding provided by the U.S.  
Department of Energy Office of Energy Efficiency and Renewable Energy Wind Energy Technologies Office. The views  
expressed in the article do not necessarily represent the views of the DOE or the U.S. Government. The U.S. Government retains  
and the publisher, by accepting the article for publication, acknowledges that the U.S. Government retains a nonexclusive,  
paid-up, irrevocable, worldwide license to publish or reproduce the published form of this work, or allow others to do so, for  
805 U.S. Government purposes.

*Code and data availability.* The data used for the present analysis can be obtained by contacting the authors.

*Author contributions.* HC modified the  $C_p$ -Max code to support the scaled matching optimization, designed the subscale models, performed  
the simulations and analyzed the results; CLB devised the original idea of this research, performed the scaling analysis, formulated the  
matching optimization problem and supervised the work; PB collaborated in the modification of the software, the design of the subscale  
810 models and the conduction of the numerical simulations. HC and CLB wrote the manuscript. All authors provided important input to this  
research work through discussions, feedback and by improving the manuscript.

*Competing interests.* The authors declare that they have no conflict of interest.

*Acknowledgements.* The authors would like to thank Chengyu Wang and Daniel J. Barreiro of the Technical University of Munich for the  
computation of the airfoil polars using CFD for multiple Reynolds numbers. Additionally, credit goes to Eric Loth of the University of  
815 Virginia for having introduced the authors to the zooming approach, and to Filippo Campagnolo of the Technical University of Munich for  
the fruitful discussions and support. This work was authored in part by the National Renewable Energy Laboratory, operated by Alliance for  
Sustainable Energy, LLC, for the U.S. Department of Energy (DOE) under Contract No. DE-AC36-08GO28308. Funding provided by the

U.S. Department of Energy Office of Energy Efficiency and Renewable Energy Wind Energy Technologies Office. The views expressed in the article do not necessarily represent the views of the DOE or the U.S. Government. The U.S. Government retains and the publisher, by  
820 accepting the article for publication, acknowledges that the U.S. Government retains a nonexclusive, paid-up, irrevocable, worldwide license to publish or reproduce the published form of this work, or allow others to do so, for U.S. Government purposes.

*Financial support.* This work is funded in part by the WINSSENT project (FKZ: 0324129F), which receives funding from the German Federal Ministry for Economic Affairs and Energy (BMWi).

## Nomenclature

|     |                |                                                           |
|-----|----------------|-----------------------------------------------------------|
| 825 | $a$            | Axial induction factor                                    |
|     | $a_s$          | Speed of sound                                            |
|     | $c$            | Chord length                                              |
|     | $d$            | Out-of-plane blade section flapping displacement          |
|     | $f$            | Characteristic frequency                                  |
| 830 | $g$            | Acceleration of gravity                                   |
|     | $l$            | Characteristic length                                     |
|     | $n_l$          | Geometric scaling factor, i.e. $l_M/l_P$                  |
|     | $n_t$          | Time scaling factor, i.e. $t_M/t_P$                       |
|     | $n_\Omega$     | Angular velocity scaling factor, i.e. $\Omega_M/\Omega_P$ |
| 835 | $n_v$          | Wind speed scaling factor, i.e. $V_M/V_P$                 |
|     | $\mathbf{p}$   | <u>~Vector of design parameters</u>                       |
|     | $r$            | Spanwise coordinate                                       |
|     | $s$            | Tip deflection                                            |
|     | $t$            | Time                                                      |
| 840 | $u$            | Characteristic speed                                      |
|     | $A$            | Rotor disk area                                           |
|     | $A_b$          | Blade planform area                                       |
|     | $B$            | Number of blades                                          |
|     | $C_D$          | Drag coefficient                                          |
| 845 | $C_L$          | Lift coefficient                                          |
|     | $C_{L,\alpha}$ | Slope of the lift curve                                   |
|     | $C_P$          | Power coefficient                                         |
|     | $C_T$          | Thrust coefficient                                        |
|     | $E$            | Young's modulus or airfoil efficiency $C_L/C_D$           |
| 850 | $EJ$           | Bending stiffness                                         |
|     | $Fr$           | Froude number                                             |



|     |                     |                                                               |
|-----|---------------------|---------------------------------------------------------------|
|     | $I$                 | Rotor polar moment of inertia                                 |
|     | $I_b$               | Blade flapping inertia                                        |
| 855 | $\tilde{J}$<br>$K$  | $\sim$ Cost function<br>Stiffness                             |
|     | $Lo$                | Lock number                                                   |
|     | $\tilde{M}$<br>$Ma$ | $\sim$ Mass<br>Mach number                                    |
|     | $P$                 | Aerodynamic power                                             |
| 860 | $Q$                 | Torque                                                        |
|     | $R$                 | Rotor radius                                                  |
|     | $Re$                | Reynolds number                                               |
|     | $Ro$                | Rossby number                                                 |
|     | $St$                | Strouhal number                                               |
| 865 | $T$                 | Thrust force                                                  |
|     | $U_P$               | Flow velocity component perpendicular to the rotor disk plane |
|     | $U_T$               | Flow velocity tangent to the rotor disk plane                 |
|     | $V$                 | Wind speed                                                    |
|     | $W$                 | Flow speed relative to a blade section                        |
| 870 | $\beta$             | Blade pitch                                                   |
|     | $\epsilon$          | Strain                                                        |
|     | $\theta$            | Sectional pitch angle                                         |
|     | $\kappa$            | Reduced frequency                                             |
|     | $\lambda$           | Tip-speed ratio                                               |
| 875 | $\lambda_d$         | Design TSR                                                    |
|     | $\mu$               | Fluid dynamic viscosity                                       |
|     | $\nu$               | Poisson coefficient                                           |
|     | $\rho$              | Air density                                                   |
|     | $\rho_m$            | Material density                                              |
| 880 | $\rho_P$            | Power density                                                 |
|     | $\sigma$            | Stress                                                        |
|     | $\tau$              | Nondimensional time                                           |
|     | $\omega$            | Natural frequency                                             |
|     | $\Gamma$            | Circulation                                                   |
| 885 | $\Delta\theta$      | Total blade twist from root to tip                            |
|     | $\Sigma$            | Rotor solidity                                                |
|     | $\Phi$              | Rotor uptilt angle                                            |
|     | $\Xi$               | Rotor cone angle                                              |
|     | $\Omega$            | Rotor angular velocity                                        |

|     |                       |                                                                        |
|-----|-----------------------|------------------------------------------------------------------------|
| 890 | $(\cdot)_a$           | <u>~Pertaining to the aerodynamic design</u>                           |
|     | $(\cdot)_s$           | <u>~Pertaining to the structural design</u>                            |
|     | $(\cdot)_M$           | Scaled system                                                          |
|     | $(\cdot)_P$           | Full-scale physical system                                             |
|     | $\dot{(\cdot)}$       | Derivative with respect to time, i.e. $d \cdot / dt$                   |
| 895 | $(\cdot)'$            | Derivative with respect to nondimensional time, i.e. $d \cdot / d\tau$ |
|     | $\widetilde{(\cdot)}$ | Nondimensional quantity                                                |
|     | $\widehat{(\cdot)}$   | <u>~To-be-matched scaled quantity</u>                                  |
|     | AEP                   | Annual energy production                                               |
|     | BEM                   | Blade element momentum theory                                          |
| 900 | Bx                    | Biaxial                                                                |
|     | CBRM                  | Combined bending root moment                                           |
|     | CFD                   | Computational fluid dynamics                                           |
|     | CFRP                  | Carbon-fiber-reinforced plastic                                        |
|     | DEL                   | Damage equivalent load                                                 |
| 905 | <u>DLC</u>            | <u>~Design load case</u>                                               |
|     | EBRM                  | Edgewise bending root moment                                           |
|     | FBRM                  | Flapwise bending root moment                                           |
|     | GFRP                  | Glass-fiber-reinforced plastic                                         |
|     | LD                    | Low density                                                            |
| 910 | LE                    | Leading edge                                                           |
|     | MFTD                  | Maximum flapwise tip displacement                                      |
|     | METD                  | Maximum edgewise tip displacement                                      |
|     | PID                   | Proportional integral derivative                                       |
|     | PMMA                  | Polymethyl methacrylate                                                |
| 915 | POM                   | Polyoxymethylene                                                       |
|     | PP                    | Polypropylene                                                          |
|     | SQP                   | Sequential quadratic programming                                       |
|     | ThS                   | Thrust at main shaft                                                   |
|     | TSR                   | Tip-speed ratio                                                        |
| 920 | TE                    | Trailing edge                                                          |
|     | Tx                    | Triaxial                                                               |
|     | Ux                    | Uniaxial                                                               |

## References

- 3M Technical Data, Issue No. 3 Scotch-Weld Structural Adhesive Film AF 32: <https://multimedia.3m.com/mws/media/241415O/3mtm-scotch-weldtm-structural-adhesive-film-af-32.pdf>, last access: 18 December 2019
- Armitt J. and Counihan J.: The simulation of the atmospheric boundary layer in a wind tunnel, *J. Atmospheric Environment*, 2, 49-61, [https://doi.org/10.1016/0004-6981\(68\)90019-X](https://doi.org/10.1016/0004-6981(68)90019-X), 1968
- Anderson B., Branlard E., Vijayakumar G. and Johnson N.: Investigation of the nacelle blockage effect for downwind wind turbines, *Torque IOP J. of Phys. Conf. Series* 1618, 062062, <https://doi.org/10.1088/1742-6596/1618/6/062062>, 2020 *Proceedings (under review)*, 2020
- ANSYS Fluent 2019, <https://www.ansys.com/products/fluids/ansys-fluent>, 2019. Last access: 18 December 2019
- Azcona J., Lemmer F., Matha D., Amann F., Bottasso C.L., Montinari P., Chassapoyannis P., Diakakis K., Spyros V., Pereira R., Bredmose H., Mikkelsen R., Laugesen R. and Hansen A.M.: INNWIND. EU Deliverable D4.24: Results of wave tank tests. <http://www.innwind.eu/publications/deliverable-reports>, 2016. Last access: 18 December 2019
- Bak C., Zahle F., Bitsche R., Kim T., Yde A., Natarajan A. and Hansen M.H.: INNWIND. EU Deliverable D1.21: Reference Wind Turbine Report, <http://www.innwind.eu/publications/deliverable-reports>, 2013. Last access: 18 December 2019
- Berg J., Bryant J., LeBlanc B., Maniaci D., Naughton B., Paquette J., Resor B. and White J.: Scaled Wind Farm Technology Facility Overview, 32nd ASME Wind Energy Symposium, <https://doi.org/10.2514/6.2014-1088>, 2014
- Bisplinghoff R.L. and Ashley H., Principles of Aeroelasticity, Dover Publications, Mineola, New York, USA, 2002
- Bortolotti P., Bottasso C.L. and Croce A.: Combined preliminary-detailed design of wind turbines, *Wind Energ. Sci.*, 1, 71-88, <https://doi.org/10.5194/wes-1-71-2016>, 2016
- Bottasso C.L., and Borri M.: Integrating finite rotations, *Comp. Methods Appl. Mech. Engrg.*, 164(3-4), 307-331, [https://doi.org/10.1016/S0045-7825\(98\)00031-0](https://doi.org/10.1016/S0045-7825(98)00031-0), 1998
- Bottasso C.L., Campagnolo F. and Croce A.: Multi-disciplinary constrained optimization of wind turbines, *Multibody Syst. Dyn.*, 27, 21-53, <https://doi.org/10.1007/s11044-011-9271-x>, 2012
- Bottasso C.L., Campagnolo F. and Petrovic V.: Wind tunnel testing of scaled wind turbine models: Beyond aerodynamics, *J. Wind Eng. Ind. Aerodyn.*, 127, 11-28, <https://doi.org/10.1016/j.jweia.2014.01.009>, 2014
- Bottasso C.L., Bortolotti P., Croce A., Gualdoni F.: Integrated aero-structural optimization of wind turbines, *Multibody Syst Dyn*, 4, 317-344, <https://doi.org/10.1007/s11044-015-9488-1>, 2016
- Bottasso C.L., Cacciola S. and Schreiber J.: Local wind speed estimation, with application to wake impingement detection, *Renewable Energy*, 116, 155-168, <https://doi.org/10.1016/j.renene.2017.09.044>, 2017
- Bottasso C.L., Campagnolo F.: Wind tunnel testing of wind turbines and farms, *Handbook of Wind Energy Aerodynamics*, Springer, 2019 *(under review)* to appear, 2020
- Brondsted P., Lilholt H., and Lystrup A.: Composite Materials For Wind Power Turbine Blades, *Annu. Rev. Mater. Res.*, 35, 505-538, <https://doi.org/10.1146/annurev.matsci.35.100303.110641>, 2005
- Buckingham E.: On Physically Similar Systems; Illustrations of the Use of Dimensional Equations, *Phys. Rev.*, 4, 345-376, <https://doi.org/10.1103/PhysRev.4.345>, 1914
- Burton T., Jenkins N., Sharpe D. and Bossanyi E.: Wind energy handbook, John Wiley & Sons, West Sussex, UK, 2001
- Busan R.: Flutter Model Technology, WL-TR-97-3074, January 1998

- Cambridge University Engineering Department: Materials Data Book, <http://www-mdp.eng.cam.ac.uk/web/library/enginfo/cueddatabooks/materials.pdf>,  
 960 2003. Last access: 18 December 2019
- Campagnolo F., Bottasso C.L. and Bettini P.: Design, manufacturing and characterization of aero-elastically scaled wind turbine blades for testing active and passive load alleviation techniques within a ABL wind tunnel, *J. Phys.:Conf. Ser.*, 524, 012061, <http://doi.org/10.1088/1742-6596/524/1/012061>, 2014
- Chamorro, L.P., Arndt, R.E.A. and Sotiropoulos, F.: Reynolds number dependence of turbulence statistics in the wake of wind turbines, *Wind Energ.*, 15(5), 733–742, <https://doi.org/10.1002/we.501>, 2012  
 965 <https://doi.org/10.1002/we.501>, 2012
- Counihan J.: An improved method of simulating an atmospheric boundary layer in a wind tunnel, *Atmospheric Environment*, s3, 197-200, [https://doi.org/10.1016/0004-6981\(69\)90008-0](https://doi.org/10.1016/0004-6981(69)90008-0), 1969
- Drela, M.: Xfoil 6.99 Documentation, <http://web.mit.edu/~drela/Public/web/xfoil/>, 2017. Last access: 18 December 2019
- Dowler J.L. and Schmitz S.: A solution-based stall delay model for horizontal-axis wind turbines, *Wind Energy*, 18, 1793-1813,  
 970 <https://doi.org/10.1002/we.1791>, 2015
- Eggleston D.M., Stoddard F.S.: *Wind Turbine Engineering Design*, Van Nostrand Reinhold, New York, NY, USA, 1987
- Frederik J., Weber R., Cacciola S., Campagnolo F., Croce A., Bottasso C.L. and van Wingerden J.W.: Periodic dynamic induction control of wind farms: proving the potential in simulations and wind tunnel experiments, *Wind Energy Science Discussions*, <https://www.wind-energ-sci-discuss.net/wes-2019-50/>, 2019
- 975 Giavotto V., Borri M., Mantegazza P. and Ghiringhelli G.: Anisotropic beam theory and applications, *Comput. Struct.*, 16, 403-13, [10.1016/0045-7949\(83\)90179-7](https://doi.org/10.1016/0045-7949(83)90179-7), 1983
- Hansen M.H., Gaunaa M. and Madsen H.A.: A Beddoes-Leishman type dynamic stall model in state-space and indicial formulations, Technical University of Denmark, Riso, Denmark, [https://backend.orbit.dtu.dk/ws/portalfiles/portal/7711084/ris\\_r\\_1354.pdf](https://backend.orbit.dtu.dk/ws/portalfiles/portal/7711084/ris_r_1354.pdf), 2004. Last access: 18 December 2019
- 980 Hideharu M.: Realization of a large-scale turbulence field in a small wind tunnel, *Fluid Dynamics Research*, 8, 1-4, [https://doi.org/10.1016/0169-5983\(91\)90030-M](https://doi.org/10.1016/0169-5983(91)90030-M), 1991
- International Electrotechnical Commission: International Electrotechnical Commission, IEC 61400-1 Ed.3: Wind turbines — Part 1: Design requirements, 2005
- Jiménez Á., Crespo A. and Migoya E.: Application of a LES technique to characterize the wake deflection of a wind turbine in yaw, *Wind Energ.*, 13(6), 559–572, [10.1002/we.380](https://doi.org/10.1002/we.380), 2010  
 985 <https://doi.org/10.1002/we.380>, 2010
- Jones R.M.: *Buckling of Bars, Plates, and Shells*, Bull Ridge Publishing, Virginia, 2006
- Jonkman J.: *TurbSim User's Guide*, <https://doi.org/10.2172/15020326>, 2009
- Kress C., Chokani N. and Abhari R.S.: Downwind wind turbine yaw stability and performance, *Renewable Energy*, 83, 1157-1165, <https://doi.org/10.1016/j.renene.2015.05.040>, 2015
- 990 Loth E., Kaminski M., Qin C., Fingersh L.J. and Griffith D.T.: Gravo-Aeroelastic Scaling for Extreme-Scale Wind Turbines, 35th AIAA Applied Aerodynamics Conference, AIAA AVIATION Forum Denver, Colorado, <https://doi.org/10.2514/6.2017-4215>, 2017
- Manwell J.F., McGowan J.G., Rogers A.L.: *Wind energy explained: theory, design and application*, Second Edition, John Wiley & Sons Publication, West Sussex, United Kingdom, 2009
- Murray R.E., Jenne S., Snowberg D., Berry D. and Cousins D.: Techno-Economic Analysis of a Megawatt-Scale Thermoplastic Resin Wind  
 995 Turbine Blade, *Renewable Energy*, [10.1016/j.renene.2018.07.032](https://doi.org/10.1016/j.renene.2018.07.032), 2018

- Mydlarski L.: A turbulent quarter century of active grids: from Makita (1991) to the present, *Fluid Dynamics Research*, 49, <https://doi.org/10.1088/1873-7005/aa7786>, 2017
- Pitt D.M., Peters D.A.: Theoretical prediction of dynamic-inflow derivatives, *Vertica*, 5, 21-34, 1981
- Resor B.R., Maniaci D.C.: Definition of the National Rotor Testbed: An Aeroelastically Relevant Research-Scale Wind Turbine Rotor, 32nd ASME Wind Energy Symposium, AIAA SciTech Forum National Harbor, Maryland, <http://doi.org/10.2514/6.2014-0357>, 2013
- 1000 Selig M., Guglielmo J., Broeren A. and Giguère P.: Summary of Low-Speed Airfoil Data, SoarTech Publications, Virginia, 1995
- Simms D., Schreck S., Hand M. and Fingersh L.J.: NREL Unsteady Aerodynamics Experiment in the NASA-Ames Wind Tunnel: A Comparison of Predictions to Measurements, NREL/TP-500-29494, 2001
- Schmitz S.: Aerodynamics of Wind Turbines, A Physical Basis for Analysis and Design, John Wiley & Sons Ltd, Hoboken, NJ, USA, 2020
- 1005 Snel H., Schepers J.G. and Siccama N.B.: Mexico Project: The Database and Results of Data Processing and Interpretation, 47th AIAA Aerospace Sciences Meeting Including The New Horizons Forum and Aerospace Exposition Orlando, Florida, 10.2514/6.2009-1217, 2009
- [Ricciardi A.P., Canfield R., Patil M.J. and Lindsley N.: Nonlinear aeroelastic scaled-model design, \*Journal of Aircraft\*, 53\(1\), 20–32, 10.2514/1.C033171, 2016](#)
- 1010 Vermeer L.J., Sorensen J.N., Crespo A.: Wind Turbine Wake Aerodynamic, *Progress in Aerospace Sciences*, 39, ~~467–510~~[467–510](#), 10.1016/S0376-0421(03)00078-2, 2003
- Vestas 1994 General Specification: Vestas V27-225 kW, 50 Hz Windturbine with Tubular/Lattice Tower. Version 1.2.0.24
- [Wan Z. and Cesnik C.E.S.: Geometrically nonlinear aeroelastic scaling for very flexible aircraft, \*AIAA Journal\*, 52, 10, 2251–2260, https://doi.org/10.2514/1.J052855, 2014](#)
- 1015 [Wang C., Campagnolo F., Canet H., Barreiro D.J., and Bottasso C.L.: How realistic are the wakes of scaled wind turbine models?, \*Wind Energy Science Discussions\*, 2020](#)
- Zentrum für Solarenergie- und Wasserstoff-Forschung Baden-Württemberg: New WindForS project: Wind Energy Research in the Swabian Alps, <https://www.zsw-bw.de/en/newsroom/news/news-detail/news/detail/News/new-windfors-project-wind-energy-research-in-the-swabian-alps.html>, 2016. Last access: 18 December 2019
- 1020 Zentrum für Solarenergie- und Wasserstoff-Forschung Baden-Württemberg: ZSW and S&G Engineering Join Forces to Set Up Wind Power Field-Test Site, <https://www.zsw-bw.de/en/newsroom/news/news-detail/news/detail/News/zsw-and-sg-engineering-join-forces-to-set-up-wind-power-field-test-site.html>, 2017. Last access: 18 December 2019
